1 **A novel totivirus alters gene expression and vacuolar morphology in *Malassezia* cells**  
2 **and induces a TLR3-mediated inflammatory immune response**

3

4 Minji Park<sup>a</sup>, Yong-Joon Cho<sup>b</sup>, Donggyu Kim<sup>c</sup>, Chul-Su Yang<sup>c,d</sup>, Shi Mun Lee<sup>e</sup>, Thomas L.  
5 Dawson Jr.<sup>e,f</sup>, Satoshi Nakamizo<sup>e</sup>, Kenji Kabashima<sup>e,g</sup>, Yang Won Lee<sup>h,i</sup>, Won Hee Jung<sup>a,#</sup>

6 <sup>a</sup>Department of Systems Biotechnology, Chung-Ang University, Anseong, 17546, Korea

7 <sup>b</sup>The Research Institute of Basic Sciences, Seoul National University, Seoul, 08826, Korea

8 <sup>c</sup>Department of Molecular and Life Science, Hanyang University, Ansan 15588, Korea

9 <sup>d</sup>Department of Bionano Technology, Hanyang University, Seoul, 04673, Korea

10 <sup>e</sup>Singapore Immunology Network (SIGN) and Skin Research Institute of Singapore (SRIS),  
11 Agency for Science, Technology and Research (A\*STAR), 8A Biomedical Grove,  
12 IMMUNOS Building, Biopolis, 138648 Singapore

13 <sup>f</sup>Center for Cell Death, Injury & Regeneration, Departments of Drug Discovery &  
14 Biomedical Sciences and Biochemistry & Molecular Biology, Medical University of South  
15 Carolina, Charleston, SC, 29425, United States

16 <sup>g</sup>Department of Dermatology Kyoto University Graduate School of Medicine, Kyoto, 606-  
17 8507, Japan

18 <sup>h</sup>Department of Dermatology, School of Medicine, Konkuk University, Seoul, 05029, Korea

19 <sup>i</sup>Research Institute of Medicine, Konkuk University, Seoul, 05029, Korea

20

21

22

23

24 Running Head: A novel totivirus in *Malassezia*

25

26 #Address correspondence to Won Hee Jung, [whjung@cau.ac.kr](mailto:whjung@cau.ac.kr)

27

28 Word counts

29 Abstract: 206 words; Text: 4,730 words

30

31

32 **Abstract**

33 Most fungal viruses have been identified in plant pathogens, whereas the presence of viral  
34 particles in human pathogenic fungi is less well studied. In the present study, we observed  
35 extrachromosomal double-stranded RNA (dsRNA) segments in various clinical isolates of  
36 *Malassezia* species. *Malassezia* is the most dominant fungal genus on the human skin surface,  
37 and species in this group are considered to be etiological factors in various skin diseases  
38 including dandruff, seborrheic dermatitis, and atopic dermatitis. We identified novel dsRNA  
39 segments and our sequencing results revealed that the virus, named MrV40, belongs to the  
40 *Totiviridae* family and contains an additional satellite dsRNA segment encoding a novel  
41 protein. The transcriptome of virus-infected *M. restricta* cells was compared to that of virus-  
42 free cells, and the results showed that transcripts involved in ribosomal biosynthesis were  
43 down regulated and those involved in energy production and programmed cell death were  
44 increased in abundance. Moreover, transmission electron microscopy revealed significantly  
45 larger vacuoles for virus-infected *M. restricta* cells, indicating that MrV40 infection  
46 dramatically altered *M. restricta* physiology. Our analysis also revealed that a viral nucleic  
47 acid from MrV40 induces a TLR3-mediated inflammatory immune response in bone marrow-  
48 derived dendritic cells (BMDCs) and this result suggests that a viral element contributes to  
49 the pathogenesis of *Malassezia*.

50

51 **Importance**

52 *Malassezia* is the most dominant fungal genus on the human skin surface and is associated  
53 with various skin diseases including dandruff and seborrheic dermatitis. Among *Malassezia*  
54 species, *M. restricta* is the most widely observed species on the human skin. In the current  
55 study, we identified a novel dsRNA virus, named MrV40, in *M. restricta* and characterized  
56 the sequences and structure of the viral genome along with an independent satellite dsRNA  
57 viral segment. Moreover, we found altered expression of genes involved in ribosomal  
58 synthesis and programmed cell death, indicating that virus infection altered the physiology of  
59 the fungal host cells. Our data also showed that the viral nucleic acid from MrV40 induces a  
60 TLR3-mediated inflammatory immune response in bone marrow-derived dendritic cells  
61 (BMDCs), indicating that a viral element likely contributes to the pathogenesis of *Malassezia*.  
62 This is the first study to identify and characterize a novel mycovirus in *Malassezia*.

63

## 64 **Introduction**

65 Viruses have been observed in many fungal species since their first identification in  
66 mushrooms (1). Fungal viruses, also known as mycoviruses, possess different forms of viral  
67 genomes including double-stranded RNA (dsRNA), single-stranded RNA (ssRNA), and  
68 single-stranded DNA (ssDNA). It is estimated that 30–80% of all fungal species, mainly  
69 endophytic fungi, are infected with viruses. Unlike viruses that infect other organisms, the  
70 transmission of fungal virus occurs vertically by cell division or horizontally via mating or  
71 hyphal anastomosis, with no extracellular phase of the virus life cycle. dsRNA segments have  
72 predominantly been found for fungal viruses and, taxonomically, the fungal dsRNA viruses  
73 are classified into seven families: *Chrysoviridae*, *Endornaviridae*, *Megabirnaviridae*,  
74 *Quadriviridae*, *Partitiviridae*, *Reoviridae*, and *Totiviridae* (2).

75 The model fungus *Saccharomyces cerevisiae* also carries a dsRNA virus that belongs to the  
76 *Totiviridae* family and is known as the L-A virus. A unique feature of fungal viruses of the  
77 *Totiviridae* family is their capability to produce the killer toxin that lyses susceptible neighbor  
78 strains, whereas the virus-containing strain (also known as a killer strain) is immune to the  
79 toxin. Studies of how the virus produces killer toxins in *S. cerevisiae* showed that killer toxins  
80 are encoded by a satellite dsRNA segment, known as the M satellite, within the L-A virus. To  
81 date, four different killer toxins, K1, K2, K28, and Klus have been described (3-6). The *S.*  
82 *cerevisiae* L-A virus forms icosahedral particles with a diameter of approximately 39 nm (7).  
83 The virus possesses a non-segmented 4.6-kb dsRNA genome consisting of two open reading  
84 frames (ORFs), *gag* and *pol*, which overlap by 130 base pairs (bp) (8). *gag* encodes a major  
85 76-kDa capsid protein (CP), and a 180-kDa minor protein species is encoded as a Gag-Pol  
86 fusion protein by a -1 ribosomal frame-shift event (9, 10). The C-terminus of the Gag-Pol

87 fusion protein possesses viral RNA-dependent RNA polymerase (RDRP) activity (8). The  
88 ribosomal frameshift is an interesting feature in a compact viral genome and has been  
89 commonly found in various viral genomes as a mechanism to allow viruses to express  
90 overlapping ORFs. Studies of *S. cerevisiae* L-A virus revealed that the mechanism of  
91 frameshifting is based on the sequence structures including a canonical slippery heptamer, 5'-  
92 X XXY YYZ-3' (X= A, U or G; Y=A or U; Z=A, U, or C) and RNA pseudoknot (11).

93 Fungal viruses have also been considered as biocontrol agents in the field of agriculture. For  
94 example, a virus causes hypovirulence in the chestnut blight fungus *Cryphonectria parasitica*  
95 (12, 13), and a virus mediates the biocontrol of other phytopathogenic fungi such as  
96 *Helminthosporium victoriae*, *Sclerotinia sclerotiorum*, and *Botrytis cinerea* (14).

97 Although viral infections in fungal cells are widespread, the interactions between the fungal  
98 virus and its host are not well understood. One of the most studied host defense mechanisms  
99 is RNA silencing. Several studies have shown that RNA silencing functions as an antiviral  
100 defense mechanism against *C. parasitica* in fungi. Disruption of the dicer pathway in *C.*  
101 *parasitica* increases the susceptibility to virus infections (15), and p29 was identified as a  
102 suppressor that inhibits expression of the genes required for RNA silencing-mediated viral  
103 defense in the fungus (16). Similarly, conserved RNA silencing-mediated antiviral defense  
104 systems have been identified in *Aspergillus nidulans*, *Rosellinia necatrix*, and *Fusarium*  
105 *graminearum* (17-19).

106 *Malassezia* is the most dominant fungal genus on the human skin surface and is considered as  
107 an etiological factor in various skin diseases including dandruff, seborrheic dermatitis, and  
108 atopic dermatitis (20-23). Eighteen *Malassezia* species have been identified; among them, *M.*  
109 *restricta* is the most abundant on the human skin (20). Recent studies showed an increased

110 burden of *M. restricta* on the scalp of patients with dandruff, indicating an association  
111 between dandruff and the fungus although its role as a pathogenic organism is still unclear,  
112 and the host susceptibility should be taken into consideration (21, 24-27). Most fungal viruses  
113 are found in plant pathogenic fungi, whereas few examples of viral particles have been  
114 identified in human pathogenic fungi such as *Candida albicans* (28). In the present study, we  
115 observed extrachromosomal dsRNA segments in various *M. restricta* clinical isolates which  
116 represented a novel viral genome and its satellite. Sequence analysis revealed that the virus  
117 belongs to the *Totiviridae* family and that the additional satellite dsRNA segment encodes a  
118 novel protein. The interactions between the viral elements and the fungal host, and the impact  
119 of the virus on fungal interactions with immune cells were evaluated.

120

## 121 **Results**

### 122 **Identification of extrachromosomal dsRNA segments in *Malassezia***

123 Extrachromosomal nucleic acid bands were observed in total nucleic acid extracts of the *M.*  
124 *restricta* strains isolated in our recent study (29). Among the strains, *M. restricta* KCTC  
125 27540 was used to identify extrachromosomal segments. Total nucleic acids were extracted  
126 from the strain and digested with DNase I, RNase A, and RNase T1. The extrachromosomal  
127 segments and ribosomal RNA were resistant to DNase I, indicating that they were neither  
128 ssDNA nor dsDNA. RNase A degraded all nucleic acids except for genomic DNA, whereas  
129 RNase T1, which catalyzes the degradation of ssRNA, removed ribosomal RNA only (30).  
130 These results suggested that the extrachromosomal segments correspond to dsRNA, and that  
131 *M. restricta* KCTC 27540 possesses two separate extrachromosomal segments estimated by  
132 agarose gel electrophoresis to be approximately 4.5 and 1.5 kb (Fig. 1A).

133 To confirm whether the extrachromosomal segments observed in other *M. restricta* clinical  
134 isolates were also dsRNA, total nucleic acid extracts from the strains other than *M. restricta*  
135 KCTC 27540 were treated with DNase I and RNase T1. The extrachromosomal segments  
136 remained unaffected after enzyme treatment, indicating that they are also dsRNA, as in *M.*  
137 *restricta* KCTC 27540 (Fig. 1B). Moreover, other *Malassezia* species including *M. globosa*,  
138 *M. pachydermatis*, and *M. sympodialis* showed similar extrachromosomal dsRNA segments  
139 suggesting that these segments are common characteristics of *Malassezia* species (Fig. 1C).  
140 Agarose gel electrophoresis revealed extrachromosomal segments composed of at least two  
141 separate dsRNA fragments except for *M. restricta* KCTC 27543, which showed a single  
142 dsRNA fragment. Additionally, the large fragments of dsRNA showed similar sizes (~5.0 kb),  
143 whereas the small dsRNA segments varied in size in different strains (Fig. 1B and 1C). We  
144 hypothesized that the dsRNA segments from *Malassezia* strains represent the dsRNA  
145 elements of mycoviruses, which are prevalent in all major fungal taxa (2).

146 Sucrose gradient ultracentrifugation was conducted to purify virus particles to confirm that  
147 the dsRNA segments in the *Malassezia* strains were indeed viral elements. The separated  
148 nucleic acids and proteins in each fraction were analyzed. Two dsRNA fragments (~5.0 and  
149 ~1.7 kb) were clearly visible in fractions 1–6 following agarose gel electrophoresis (Fig. 2A).  
150 Moreover, the results of sodium dodecyl sulfate-poly acrylamide gel electrophoresis (SDS-  
151 PAGE) showed that fractions 3–6 contained protein bands with an estimated molecular  
152 weight of ~77 kDa (Fig. 2B). This molecular weight is similar to that of the known capsid  
153 protein of the *S. cerevisiae* mycovirus (9, 31, 32). Fractions 3–6 were subsequently evaluated  
154 by microscopy to visualize mycovirus particles in *M. restricta*. Transmission electron  
155 microscopy (TEM) images showed virus-like particles with an isometric shape and a



156 diameter of 43 nm (Fig. 2C). These results support the hypothesis that the extrachromosomal  
157 dsRNA segments formed the genome of mycovirus in *M. restricta* KCTC27540. We named  
158 the viral particle as MrV40 (*M. restricta* KCTC 27540 Mycovirus). The large and small  
159 dsRNA viral fragments were named as MrV40L and MrV40S, respectively. In addition to  
160 evaluating images of the purified virus particle, we examined the morphology of *M. restricta*  
161 KCTC27540 cells containing the mycovirus for comparison with virus-free cells of *M.*  
162 *restricta* KCTC 27527 by TEM. The results showed that, in general, the size of vacuoles in  
163 the virus-containing strain was significantly larger than those in the virus-free strain,  
164 suggesting that the virus influences vacuole size in *M. restricta* (Fig. 3).

165

#### 166 **Determination of dsRNA sequence of MrV40L**

167 The complete sequence of MrV40L was determined by a combination of the Illumina MiSeq  
168 technique and the Sanger sequencing method using purified viral dsRNA. The length of the  
169 complete assembled sequence of MrV40L was 4,606 bp, and two overlapping open reading  
170 frames (ORFs), designated as ORF1 and ORF2, were identified (Fig. 4A). ORF1 corresponds  
171 to the region from nucleotides (nt) 28 to 2,097 and encodes a polypeptide of 689 amino acids  
172 with a molecular weight of 77 kDa. ORF2 corresponds to the region from nt 1,949 to 4,538  
173 and encodes a polypeptide of 862 amino acids with a molecular weight of 98 kDa. The results  
174 of BLAST analysis showed that the protein sequences of ORF1 and ORF2 were highly  
175 similar to the capsid protein (CP; the Pfam families of LA-virus\_coat, PF09220) and viral  
176 RNA-directed RNA polymerase (RDRP; the Pfam family of RDRP\_4, PF02123) of *S.*  
177 *segobiensis* virus L belonging to the genus *Totivirus* (Totiviridae family) with 53%  
178 (YP\_009507830.1) and 52% (YP\_009507831.1) identities, respectively (33). Eight conserved

179 motifs, which are commonly found in totiviruses, were found within ORF2, supporting the  
180 classification of MrV40 as a totivirus (Fig. 4B) (34). Moreover, phylogenetic analysis with  
181 known amino acid sequences of RDRP of dsRNA mycoviruses demonstrated that the RDRP  
182 encoded by the MrV40L genome was clustered with totiviruses (Fig. 4C). Thus, MrV40L is a  
183 dsRNA viral genome encoding CP and RDRP, and we propose that MrV40 belongs to the  
184 *Totivirus* genus.

185 Next, we analyzed the genomic sequences of dsRNA viruses in other clinical *M. restricta*  
186 isolates to confirm that they were similar to those of MrV40L, and thus belong to the  
187 *Totivirus* genus. RT-PCR was performed using four primer sets corresponding to the sequence  
188 of the conserved regions of CP and RDRP in the MrV40L genome (Fig. 5A). The results  
189 showed that six of 11 viruses generated RT-PCR products, suggesting the presence of viral  
190 genomes similar to MrV40Ls, while the remaining samples had dissimilar viral genomes (Fig.  
191 5B).

192 Furthermore, we performed phylogenetic classification of the same viruses found in other  
193 clinical *M. restricta* isolates by multilocus sequence typing of the 1,075-bp region, 638 bp of  
194 ORF1, and 437 bp of ORF2, corresponding to *gag* and *pol*, respectively, within the viral  
195 genomes. The results revealed that the viruses were classified into three clades: clade I  
196 (MrV12L, MrV16L, MrV40L, MrV79L, MrV80L, and MrV82L), clade II (MrV18L,  
197 MrV43L, MrV83L, and MrV50L), and clade III (MrV24L) (Fig. 5C). Additionally, the  
198 sequences of the 1,075-bp region of MrV40L, MrV79L, and MrV82L in the clade I were 100%  
199 identical, suggesting that they originated from the same lineage.

200

201 **Determination of dsRNA sequence of MrV40S**

202 To determine the sequence of MrV40S, the dsRNA segments of MrV40S were extracted from  
203 agarose gels and then subjected to cDNA cloning and sequencing (See Materials and  
204 Methods). Using the partial sequences obtained from cDNA clones and the sequences  
205 obtained from repeated 5' rapid amplification of cDNA ends (RACE), we successfully  
206 determined the complete sequence of MrV40S. The sequence of MrV40S was 1,355 bp, and  
207 a single ORF was identified in the 3' region (from nt 773 to 1,097) which encoded a  
208 polypeptide of 124 amino acids with a molecular weight of 15.6 kDa. The ORF was  
209 designated as ORF3. Although we obtained the complete sequence of MrV40S, no  
210 homologous protein sequence was identified by BLAST analysis using all currently available  
211 databases.

212 Mycoviruses belonging to totivirus, particularly the *S. cerevisiae* LA-virus, often possess a  
213 satellite dsRNA segment known as M dsRNA, which is responsible for producing a killer  
214 toxin that excludes neighboring yeast cells. Because MrV40L resembles M dsRNA, we  
215 predicted that MrV40S produces a protein that inhibits other *Malassezia* strains and/or other  
216 fungal and/or bacterial cells residing on the skin. To test the toxin-like activity of the protein  
217 produced from MrV40S, ORF3 was cloned and the protein was heterologously expressed in  
218 *Escherichia coli* and purified (Fig. 6A). The activity of the purified protein was evaluated  
219 against several pathogenic fungi and bacteria including *M. restricta*, *C. albicans*,  
220 *Cryptococcus neoformans*, *E. coli*, and *Staphylococcus aureus*. Unexpectedly, the purified  
221 protein displayed no growth inhibitory effect on the microbial cells tested (data not shown).  
222 Based on these results, we concluded that the novel protein produced from ORF3 likely has  
223 no toxin-like activity against the microorganisms tested, and further functional studies are  
224 required to characterize its function.

225 M dsRNA in *S. cerevisiae* produce several variants of killer toxins, M1, M2, M3, and Mlus,  
226 and they showed limited homology in their protein sequences (4-6). Based on this  
227 information, we compared the sequences of satellite dsRNA genomes between MrV40S and  
228 that in other *M. restricta* strains containing the small dsRNA segments. Reverse transcription  
229 (RT)-PCR was conducted using a series of primers specific to MrV40S. The results suggested  
230 that among the nine strains tested, only the satellite dsRNA in *M. restricta* KCTC 27582  
231 possessed a similar dsRNA segment. These data indicate that the satellite dsRNA genome  
232 sequences are highly variable (Fig. 6B).

233

#### 234 **MrV40 altered transcriptome profiles in the host *M. restricta* strain**

235 To understand the influence of MrV40 on the host physiology, we sequenced and compared  
236 the transcriptomes of *M. restricta* KCTC27540 containing MrV40 and a strain sterilized by  
237 numerous serial passages, named as the virus-cured strain (see Materials and Methods, and  
238 Fig. S1). Transcriptome analysis showed that 258 and 809 genes were up- and down-  
239 regulated by more than 2-fold, respectively, in the virus-infected strain compared to the virus-  
240 cured strain (Table 1 and Table S1). These results indicate that the presence of the virus may  
241 impact a number of physiological processes in *M. restricta*.

242 In *S. cerevisiae*, numerous genes are known to be involved in maintaining its dsRNA virus  
243 (35) and are categorized into two groups: *MAK* (maintenance of killer) and *SKI* (superkiller).  
244 At least 25 *MAK* genes have been reported (36); among them, *MAK3*, *MAK10*, and *PET18*  
245 were shown to be required for the maintenance of both *S. cerevisiae* L-A virus and its M  
246 satellite, whereas all other *MAK* genes are responsible only for the M satellite (37-42). We  
247 couldn't find the homologs of *MAK10* or *PET18* in the genome of *M. restricta*, suggesting

248 that a different or modified virus maintenance mechanism may be present in the fungus  
249 compared to *S. cerevisiae* (Table 2). The results also showed that among the *MAK* homologs,  
250 *MAK1*, *MAK5*, *MAK11*, *MAK16*, *MAK21*, *MAK7*, and *MAK8* were downregulated by more  
251 than 2-fold. In *S. cerevisiae*, these genes, except for *MAK1*, were involved in 60S ribosomal  
252 subunit biosynthesis and M satellite maintenance. Thus, we predicted that MrV40 reduced  
253 ribosomal biogenesis within the host. Additionally, *M. restricta* contained a series of *SKI*  
254 homologs. However, no genes were differentially expressed in *M. restricta* KCTC27540  
255 containing MrV40 compared to the virus-cured strain, indicating that the function of *SKI*  
256 genes was not critical for maintaining the virus.

257 In addition to the genes involved in virus maintenance, we observed upregulation of  
258 numerous genes required for the TCA cycle and the electron transport chain, including  
259 MRET\_1104 (NADH dehydrogenase (ubiquinone) Fe-S protein 7), MRET\_1378 (succinate  
260 dehydrogenase (ubiquinone) iron-sulfur subunit), MRET\_1953 (NADH dehydrogenase  
261 (ubiquinone) Fe-S protein 1), MRET\_2042 (fumarate hydratase, class II), MRET\_2097  
262 (succinate dehydrogenase (ubiquinone)), MRET\_2956 (2-oxoglutarate dehydrogenase E1  
263 component), MRET\_3173 (dihydrolipoamide dehydrogenase) and MRET\_4117 (aconitate  
264 hydratase) (Table 3). These results suggest that virus maintenance and propagation may  
265 require higher energy production in the host cell.

266 The overall dysregulation of primary metabolism may disturb the normal cell physiology in  
267 the *M. restricta* strain infected with MrV40. Indeed, we observed up-regulation of genes  
268 involved in programmed cell death in the fungal host cells. For example, the expression of  
269 MRET\_3200 (p38 MAP kinase), MRET\_1134 (programmed cell death 6-interacting protein),  
270 and MRET\_2499 (autophagy-related protein, *ATG101*), which are associated with  
271 programmed cell death, was upregulated by 4.43-, 3.14-, and 2.83-fold in the virus-infected

272 fungal cells, respectively. Moreover, MRET\_0103 (FAS-associated factor), which is involved  
273 in Fas-induced cell death, was found to be strongly upregulated (8.80-fold) in the presence of  
274 the virus within the fungal host (43). It is well-known that programmed cell death is triggered  
275 during virus infection (44, 45), and our findings agree with this observation. Differential  
276 expression of numerous genes involved in energy metabolism and programmed cell death  
277 may have influenced the abnormally larger vacuole in the MrV40-containing strain observed  
278 by TEM (Fig. 3C).

279

### 280 **MrV40 induced the TLR3-mediated immune system**

281 Since it was first reported that fungal viral dsRNA induces cytokine production in rabbits (46-  
282 48), several studies have demonstrated that Toll-like receptor 3 (TLR3) plays a central role in  
283 viral dsRNA recognition and production of inflammatory cytokines in innate immune cells  
284 (49, 50). Additionally, a recent study showed that *S. cerevisiae* viral dsRNA stimulates the  
285 immune system through TLR3 in a human embryonic kidney cell line (51). We therefore  
286 investigated whether MrV40 itself or the virus-containing *Malassezia* cells alter the  
287 expression patterns of TLRs and cytokine production in mammalian cells. To this end, bone  
288 marrow-derived dendritic cells (BMDCs) obtained from C57BL/6 mice, which have been  
289 used as a model to study the interactions between fungal cells, including *Malassezia*, and the  
290 innate immune system in a mammalian host (52, 53), were used in our study.

291 Purified MrV40 dsRNA, capsid protein of MrV40, total cell lysates of virus-infected *M.*  
292 *restricta* strains (KCTC 27540 and KCTC 27550), and virus-free *M. restricta* strains (KCTC  
293 27527 and KCTC 27539) were co-incubated with BMDCs, and the expression of TLRs and  
294 cytokines were analyzed. First, we found that TLR3 expression was significantly induced by

295 purified dsRNA, whereas the expression of other TLRs were unchanged. These results were  
296 supported by observation of highly increased expression of TLR3 in the cell lysates of the  
297 virus-infected *Malassezia* strains KCTC 27527 and KCTC 27539 compared to virus-free  
298 strains. However, the purified capsid protein from MrV40 did not alter the expression level of  
299 any TLR, indicating that dsRNA, but not the capsid protein, induced *TLR3* expression (Fig.  
300 7A).

301 We also evaluated the expression of several inflammatory cytokines including tumor necrosis  
302 factor (TNF)- $\alpha$ , interleukin (IL)-6, IL-10, interferon (IFN)- $\alpha$  and IFN- $\gamma$ , in response to  
303 MrV40 dsRNA, capsid protein, and *M. restricta* cell extracts with or without the virus.  
304 Particularly, IFN- $\alpha$  and IFN- $\gamma$  were examined because they are known to be involved in the  
305 antiviral response in mammals (54). The results of the cytokine analysis indicated that  
306 purified MrV40 dsRNA and the cell extracts of the *M. restricta* strains containing the virus  
307 showed significantly increased production of all cytokines tested. However, a relatively small  
308 increase was observed in BMDCs treated with purified capsid protein, suggesting that the  
309 MrV40 capsid contributes to cytokine production, but the contribution of the protein is  
310 marginal (Fig. 7B). Cytokine profiles were also measured in homozygous *TLR3* knockout  
311 mice, as our observations suggested a connection between TLR3 and cytokine production  
312 upon MrV40 treatment. As shown in Fig. 7B, compared to wild-type BMDCs, cytokine levels  
313 in BMDCs isolated from *TLR3* knockout mice were not significantly altered. These data  
314 suggest that increased production of the cytokines TNF- $\alpha$ , IL-6, IL-10, IFN- $\alpha$ , and IFN- $\gamma$  in  
315 response to MrV40 was TLR3-dependent in BMDCs. Our data also showed that the MrV40  
316 capsid proteins caused a marginal increase in cytokine expression in both wild-type and *TLR3*  
317 knockout BMDCs, indicating that the response to the viral capsid is TLR3-independent.

318 Notably, small increases in the production of TNF- $\alpha$  and IFN- $\alpha$  in *TLR3* knockout mice in  
319 response to the cell extract of virus-infected *M. restricta* KCTC 27540 were ignored in our  
320 results because only one sample among the two virus-infected strains displayed an increase.  
321 The change in IL-10 in the same mutant BMDCs was also excluded because the differences  
322 were statistically insignificant. Overall, our data suggest that dsRNA in MrV40 triggers an  
323 increase in the production of cytokines involved in inflammation and that TLR3 plays a  
324 central role in the host response.

325

## 326 **Discussion**

327 In the current study, we detected dsRNA virus in several clinical isolates of *Malassezia*  
328 species. Among them, MrV40 identified in *M. restricta* KCTC 27540 was selected, and its  
329 genome structure, effects on host gene expression, and influence on the mammalian immune  
330 response were evaluated. Our data showed that MrV40 consists of two RNA segments, which  
331 we named as MrV40L and MrV40S. The results of genome sequence analysis suggested that  
332 these segments were 4,606 and 1,355 bp, respectively, and belong to the totivirus. Typically,  
333 the genomes of the viruses belonging to the genus *Totivirus* consist of non-segmented dsRNA  
334 with sizes between 4.6 and 7.0 kb, and contain two ORFs, *gag* and *pol*. Studies have  
335 specifically examined the genome structure of *Totivirus* because of the overlapping nature of  
336 the two ORFs, where a -1 frameshift occurs, resulting translation of the fusion protein (2).  
337 The overlapping ORFs and frameshift were frequently observed in a compact viral genome to  
338 translate proteins and were found in several dsRNA and ssRNA viruses; these ORFs allow  
339 ribosomes to translate CP and RDRP continuously with a missing CP termination codon (11,  
340 55, 56). It was reported that the mechanism of frameshifting in the viral genome is based on



341 the pseudoknot structure of the mRNA for efficient slipping via a slippery site (57). For  
342 example, in the genome of the *S. cerevisiae* L-A virus, the 5' ORF (*gag*) encodes a 76-kDa  
343 CP and the 3' ORF (*pol*) encodes an RDRP which is expressed as a 180-kDa CP-RDRP  
344 fusion protein generated by a -1 ribosomal frameshift (8, 11). In our study, MrV40L (the  
345 major dsRNA segment in MrV40) contained two overlapping ORFs, ORF1 and ORF2. We  
346 identified a putative slippery site heptamer, 5'-GGGTTTT-3', at the region from nt 1, 968 to  
347 1,974 for the -1 ribosomal frameshift, which may be associated with production of the fusion  
348 protein of 170 kDa in MrV40L. A previous study suggested that in the *S. cerevisiae* L-A virus,  
349 the rate of ribosomal frameshifts was approximately 1.8%, giving 120 CP and 2 CP-RDRP  
350 fusion protein molecules per virus particle (11). Considering the low efficiency of producing  
351 the fusion proteins by ribosomal frameshifting, we expected to observe a significantly lower  
352 translation rate of the fusion protein; indeed, the putative 170-kDa band was not detected by  
353 SDS-PAGE. In addition to MrV40L, we determined the sequence of the satellite dsRNA  
354 segment MrV40S and found that it consists of 1,355 nt containing a single ORF, ORF3,  
355 producing a novel 15.6-kDa protein. As observed for other totiviruses, the possible toxin-like  
356 activity of the protein was investigated in our study, but no growth inhibitory activity against  
357 several bacteria and fungi was observed.

358 It has been estimated that 30–80% of fungal species in nature are infected with viruses, and a  
359 fungal host normally shows no specific symptoms upon infection (14). However, several  
360 genes were shown to be required for maintaining and propagating viruses in the host fungal  
361 cells. In *S. cerevisiae*, numerous chromosomal genes are known to be involved in viral  
362 propagation and expression of the viral killer toxin (35). Furthermore, several genes are  
363 known to be responsible for maintaining the L-A virus and M dsRNA in *S. cerevisiae*. The  
364 *MAK* genes are required for the propagation and maintenance of the L-A virus and M dsRNA

365 in *S. cerevisiae* (58). Among the *MAK* genes, *MAK3*, *MAK10*, and *PET18* are required for the  
366 maintenance of both L-A virus and M dsRNA, whereas all other *MAK* genes are responsible  
367 only for M dsRNA (37-42). Particularly, *MAK3* encodes an N-acetyltransferase and is  
368 required for N-acetylation of the coat protein (37, 59). A previous study showed that the coat  
369 proteins without acetylation failed to self-assemble, resulting in the loss of all dsRNA viruses  
370 (38). *MAK10* and *PET18* (*MAK30+MAK31*) encode a non-catalytic subunit of N-terminal  
371 acetyltransferase and a protein of unknown function, respectively. Mutant strains lacking  
372 each gene contained unstable viral particles, indicating that the genes are involved in the  
373 structural stability of LA-virus and M dsRNA (39). *MAK1* (*MAK17*, *TOP1*) encodes DNA  
374 topoisomerase I, and other *MAK* genes including *MAK2*, *MAK5*, *MAK11*, *MAK16*, *MAK21*,  
375 *MAK7* (*RPL4A*), *MAK8* (*TCM1*), and *MAK18* (*RPL41B*) are related to 60S ribosomal subunit  
376 assembly (42, 60, 61). All mutant stains lacking the above genes showed decreased levels of  
377 free 60S ribosomal subunits and the inability to maintain M dsRNA, suggesting that stable  
378 propagation of the satellite dsRNA depends on 60S ribosome synthesis (41, 42). In addition  
379 to the *MAK* genes, the *SKI* gene family has been shown to be involved in the maintenance  
380 and propagation of virus in *S. cerevisiae*. *SK11* (*XRNI*) encoding a 5'-3' exonuclease is  
381 involved in the degradation of uncapped mRNA including viral mRNA, and *SKI2*, *SKI3*,  
382 *SKI6*, *SKI7*, and *SKI8* block the translation of viral mRNAs (62-64).

383 In the current study, homologs of most *MAK* and *SKI* genes were identified in *M. restricta*.  
384 The results of the transcriptome analysis suggested that most *MAK* genes were downregulated,  
385 which may in turn reduce ribosome synthesis in the *M. restricta* strain containing MrV40. In  
386 contrast, no *SKI* homolog showed significantly altered transcript levels in the *M. restricta*  
387 strain harboring MrV40. Moreover, we found increased expression of genes involved in

388 energy metabolism and programmed cell death in the *M. restricta* strain containing the virus.  
389 Overall, our transcriptome analysis revealed that the expression of only a few genes was  
390 altered upon virus infection in *M. restricta*. Although the differential expression patterns  
391 differed from that of *M. restricta*, *S. cerevisiae* also displayed relatively small changes in  
392 fungal host gene expression upon virus infection, possibly because of co-adaptation of the  
393 virus within the fungal host (65). Maintenance and propagation of virus within the fungal  
394 host may be involved in the post-transcriptional mechanism and may contribute to the  
395 minimal changes in host gene expression. Notably, the possibility that an RNA silencing  
396 pathway in *M. restricta* cells influences virus maintenance was excluded because of the  
397 absence of homologous genes required for the pathway in the genome of the fungus.

398 In addition to transcriptome analysis, we directly investigated whether the virus influences  
399 the cellular morphology of *M. restricta* and the structures of its intracellular organelles by  
400 TEM. We observed significantly larger vacuoles in virus-infected *M. restricta* cells. An  
401 increased vacuole size upon virus infection has been reported previously. The  
402 phytopathogenic fungus *Botrytis porri* infected with dsRNA virus 1 showed the formation of  
403 abundant vacuoles (66), and turnip mosaic virus induced the large central vacuole in  
404 *Nicotiana benthamiana* plant cells (67). Particularly, in *N. benthamiana*, turnip mosaic virus  
405 particles were shown to accumulate in vacuoles and be protected by the organelle membranes  
406 against the harsh host environment, particularly during xylem vessel differentiation.  
407 Furthermore, virus accumulation in vacuoles in plant-to-plant virus transmission has been  
408 suggested (67). Although the expression of genes involved in vacuole biogenesis was not  
409 altered in transcriptome analysis in *M. restricta* cells containing the virus, there may be a  
410 relationship between vacuole functions and MrV40 in *M. restricta*. Therefore, additional

411 physiological studies are needed.

412 TLR3 is well-conserved in most vertebrates, localizes on the endosomal transmembrane, and  
413 plays a role in immune and non-immune cells. It has been suggested that TLR3 senses viral  
414 dsRNA taken up through endocytosis and contributes to defending the host against viral  
415 infection by regulating the expression of a range of cytokines (49, 68). A previous study  
416 demonstrated a significant decrease in cytokines (IFN- $\alpha/\beta$ , IFN- $\gamma$ , and IL-12p40) and increase  
417 in viral PFU in the spleen of *Tlr3*<sup>-/-</sup> mice infected with mouse cytomegalovirus (69). We  
418 found that *TLR3* expression was significantly increased by purified dsRNA from the MrV40  
419 particles and cell lysates of *M. restricta* containing the virus. The dsRNA and cell lysates also  
420 showed increased production of cytokines involved in inflammation. However, in *Tlr3*<sup>-/-</sup>  
421 BMDCs, the production of all cytokines in the cells treated with purified dsRNA from  
422 MrV40 and cell lysates of virus containing *M. restricta* was attenuated, suggesting that TLR3  
423 plays a central role in the host response against dsRNA of MrV40 and mediates the  
424 production of the cytokines. Similarly, the *Leishmania* parasite *L. guyanensis* infected with  
425 the dsRNA virus belonging to *Totivirus* induced a TLR3-mediated inflammatory immune  
426 response within the vertebrate host, indicating that the *Leishmania* RNA virus (LRV1)  
427 functions as an innate immunogen. Moreover, in *Leishmania*, LRV1 was suggested to  
428 stimulate the inflammatory immune response and increase the severity and persistence of the  
429 parasite (70). However, whether MrV40 causes hyper- or hypo-pathogenesis of *M. restricta*  
430 remains unclear. Therefore, further studies to characterize the potential function of MrV40 as  
431 an innate immunogen are needed.

432 Overall, our study demonstrated the existence of a dsRNA virus within *M. restricta*. We also  
433 determined the sequences and structure of the viral genome along with the independent RNA

434 segment. Moreover, we identified viruses not only from different strains of *M. restricta* but  
435 also from other *Malassezia* species, although variation in the viral genomes was observed.  
436 Evidence that the viral nucleic acid from MrV40 induces a TLR3-mediated inflammatory  
437 immune response was obtained, suggesting that a viral element contributes to the  
438 pathogenesis of *Malassezia*.

439

## 440 **Materials and Methods**

### 441 **Strains and growth conditions**

442 *Malassezia restricta* KCTC 27512, KCTC 27516, KCTC 27518, KCTC 27524, KCTC 27540,  
443 KCTC 27543, KCTC 27550, KCTC 27879, KCTC 27880, KCTC 27882, and KCTC 27883,  
444 *M. globosa* CBS 7966, *M. pachydermatis* KCTC 27587, and *M. sympodialis* KCTC 27817  
445 were obtained as previously described and cultured on Leeming and Notman agar (LNA)  
446 medium at 34°C for 3 days (29, 71-73). Among these strains, *M. restricta* KCTC 27540 was  
447 used to identify dsRNA viruses. *Escherichia coli* DH10B and BL21 were grown in Luria-  
448 Bertani broth at 37°C.

449

### 450 **Purification of virus particles**

451 The virus particles were purified as previously described with some modifications (66).  
452 Briefly, approximately 10 g of *M. restricta* cells was harvested and suspended in 10 mL of  
453 extraction buffer (0.1 M sodium phosphate buffer containing 3% (v/v) Triton X-100, pH 7.0).  
454 The suspended cells were vortexed with glass beads and centrifuged at 10,000 ×g at 4°C for  
455 20 min to remove cell debris. The supernatant containing crude extracts was ultracentrifuged

456 at 119,000  $\times g$  at 4°C for 2 h to precipitate all particles. The resulting pellet was suspended in  
457 1 mL of 0.1 M sodium phosphate buffer (pH 7.0), and the suspension was centrifuged at  
458 16,000  $\times g$  at 4°C for 30 min to remove large particles. The supernatant was overlaid on  
459 sucrose solution with a gradient concentration ranging from 10% to 40% (w/v) and  
460 centrifuged at 70,000  $\times g$  at 4°C for 2 h. Fractions (700  $\mu\text{L}$ /each fraction) were collected from  
461 the top of the ultracentrifuged sucrose gradient solution. Each fraction was analyzed by 1%  
462 agarose gel electrophoresis and 8% SDS-PAGE to detect dsRNA segments and protein,  
463 respectively. Methods for cell fixation and TEM are described in the Supplementary  
464 Materials and Methods.

465

#### 466 **Determination of MrV40L and MrV40S sequences**

467 The reference genome sequence was required to obtain the complete sequence of MrV40L by  
468 Illumina Miseq. We first obtained the partial fragment of MrV40L and determined its  
469 nucleotide sequence. Briefly, 1  $\mu\text{g}$  of cDNA obtained as described above was amplified using  
470 1  $\mu\text{M}$  of the tagged oligo\_1 primer to bind the tag and 1.25 units of *Taq* DNA polymerase  
471 (BIONEER, Daejeon, Korea). The amplicons were cloned into the pGEM-T vector (Promega,  
472 Madison, WI, USA), transformed into *E. coli* DH10B, and sequenced with the universal M13  
473 primers. The resulting partial sequences of MrV40L showed high similarity with the genome  
474 of *Scheffersomyces segobiensis* virus L isolate NRRL Y-11571, which was used to assemble  
475 the reference genome in our study. To sequence the entire genome of the virus from *M.*  
476 *restricta* KCTC 27540, dsRNA was purified using Cellulose A (Advantec, Taipei, Taiwan)  
477 from total cell extract as described previously (74). After purification, purified dsRNA was  
478 treated with Ambion<sup>TM</sup> DNase I (Thermo Fisher Scientific, Waltham, MA, USA) to remove

479 remaining genomic DNA remained. The sequencing library was constructed using the TruSeq  
480 Stranded Total RNA Sample Prep Kit (Illumina, San Diego, CA, USA) following the  
481 manufacturer's instructions and excluding poly-A selection. The resulting library was  
482 sequenced on an Illumina MiSeq instrument according to the manufacturer's instructions.  
483 The generated raw sequences, 250-bp paired-end reads, were assembled by CLC Genomics  
484 Workbench v7.5 (Qiagen, Hilden, Germany), and the resulting contigs were identified by  
485 BLASTN of the NCBI nucleotide database. Based on the reference genome, two contigs of  
486 MrV40L were assembled. The gap between the contigs was sequenced by gap-filling RT-PCR  
487 using primers Linkage1\_V40 and Linkage2\_V40) (see Table S2), and both termini were  
488 sequenced by RACE PCR using a 5'/3' RACE Kit, 2<sup>nd</sup> Generation (Roche, Basel, Switzerland)  
489 according to the 5' RACE protocol described by the manufacturer.

490 To determine the MrV40S genome, the RACE PCR method was used because we failed to  
491 find any contig of MrV40S. Like MrV40L, the partial sequence of cDNA from MrV40S was  
492 amplified using the tagged oligo\_1 primer. The amplicons were cloned into the pGEM-T  
493 vector (Promega) and sequenced. Using the partial sequence obtained, 5' RACE PCR was  
494 performed and repeated until no additional sequence was found.

495

#### 496 ***In silico* analysis**

497 To identify the ORFs in MrV40L and MrV40S, the nucleotide sequences of the genomes  
498 were analyzed by ORFfinder (<https://www.ncbi.nlm.nih.gov/orffinder/>). To predict ribosomal  
499 frameshift signals, a putative slippery site was identified using FSFinder2 (75). The amino  
500 acid sequences of CP and RDRP of MrV40L were analyzed using the Pfam database  
501 (<http://pfam.xfam.org/>) and BLASTP (<https://blast.ncbi.nlm.nih.gov/>). For sequence

502 alignment, Jalview2.0 was used (76). The phylogenetic tree showing the relationship of  
503 MrV40L with RDRP of other dsRNA fungal viruses was constructed using MEGA X, and  
504 phylogenetic reconstruction analysis was performed by the neighbor-joining method with  
505 1,000 bootstrap replications (77, 78).

506

### 507 **Mice and cell culture**

508 Wild-type C57BL/6 mice were purchased from Orient Bio Co. (Gyeonggi-do, Korea). *TLR3*<sup>-/-</sup>  
509 (B6;129S1-Tlr3<sup>tm1Flv</sup>/J, 005217) mice were obtained from Jackson Laboratory (Bar Harbor,  
510 ME, USA). All animal experimental procedures were reviewed and approved by the  
511 Institutional Animal Care and Use Committee of Hanyang University (protocol 2018-0085)  
512 and performed in accordance with Korean Food and Drug Administration guidelines. All  
513 animals were maintained in a specific pathogen-free environment. Primary BMDCs were  
514 isolated from C57BL/6 mice and cultured in Dulbecco's modified Eagle medium for 3–5  
515 days in the presence of 20 ng/mL recombinant granulocyte-macrophage colony-stimulating  
516 factor (R&D Systems, Minneapolis, MN, USA) as described previously (79). Cell cultures  
517 were stained to detect dendritic cells with CD11c-FITC (eBiosciences, San Diego, CA, USA).

518

### 519 **Cytokine measurement**

520 Mouse cytokines in the culture supernatants were measured with a BD OptEIA ELISA set  
521 (BD Biosciences, Franklin Lakes, NJ, USA) as described previously (80). All assays were  
522 performed according to the manufacturer's instructions. Phosphate-buffered saline (PBS) and  
523 lipopolysaccharide served as a negative and positive controls, respectively.



524

525 **cDNA synthesis, RNA isolation, transcriptome analysis, quantitative real-time PCR, and**  
526 **heterologous expression and purification of MrV40 proteins**

527 See Supplementary Materials and Methods

528

### 529 **Data availability**

530 The complete genome sequences of MrV40L and MrV40S were deposited into Genbank  
531 under accession numbers MN603497 and MN603498, respectively. The transcriptome data  
532 was deposited in Gene Express Omnibus under the accession number GSE138985.

533

### 534 **Acknowledgments**

535 We thank James W. Kronstad for critical reading of the manuscript. There is a companion  
536 paper from the Joe Heitman group at Duke University, and we thank Joe Heitman and  
537 Giuseppe Ianiri for communication. This work was supported by the National Research  
538 Foundation of Korea (NRF) grant funded by the Korea government (MSIT)  
539 2019R1A4A1024764 (WHJ), and 2019R1I1A2A01064237 (CSY).

540

541

542

543 **References**

- 544 1. Hollings M. 1962. Viruses associated with a die-back disease of cultivated  
545 mushroom. *Nature* 196:962.
- 546 2. Ghabrial SA, Caston JR, Jiang D, Nibert ML, Suzuki N. 2015. 50-plus years of  
547 fungal viruses. *Virology* 479-480:356-68.
- 548 3. Bussey H. 1991. K1 killer toxin, a pore-forming protein from yeast. *Mol Microbiol*  
549 5:2339-43.
- 550 4. Hannig EM, Leibowitz MJ. 1985. Structure and expression of the M2 genomic  
551 segment of a type 2 killer virus of yeast. *Nucleic Acids Res* 13:4379-400.
- 552 5. Schmitt MJ, Tipper DJ. 1990. K28, a unique double-stranded RNA killer virus of  
553 *Saccharomyces cerevisiae*. *Mol Cell Biol* 10:4807-15.
- 554 6. Rodriguez-Cousino N, Maqueda M, Ambrona J, Zamora E, Esteban R, Ramirez M.  
555 2011. A new wine *Saccharomyces cerevisiae* killer toxin (Klus), encoded by a double-  
556 stranded rna virus, with broad antifungal activity is evolutionarily related to a chromosomal  
557 host gene. *Appl Environ Microbiol* 77:1822-32.
- 558 7. Cheng RH, Caston JR, Wang G-j, Gu F, Smith TJ, Baker TS, Bozarth RF, Trus BL,  
559 Cheng N, Wickner RB. 1994. Fungal virus capsids, cytoplasmic compartments for the  
560 replication of double-stranded RNA, formed as icosahedral shells of asymmetric Gag dimers.  
561 Elsevier.
- 562 8. Icho T, Wickner RB. 1989. The double-stranded RNA genome of yeast virus L-A  
563 encodes its own putative RNA polymerase by fusing two open reading frames. *J Biol Chem*

564 264:6716-23.

565 9. Hopper JE, Bostian K, Rowe L, Tipper D. 1977. Translation of the L-species dsRNA  
566 genome of the killer-associated virus-like particles of *Saccharomyces cerevisiae*. *Journal of*  
567 *Biological Chemistry* 252:9010-9017.

568 10. Fujimura T, Wickner RB. 1988. Gene overlap results in a viral protein having an  
569 RNA binding domain and a major coat protein domain. *Cell* 55:663-671.

570 11. Dinman JD, Icho T, Wickner RB. 1991. A -1 ribosomal frameshift in a double-  
571 stranded RNA virus of yeast forms a gag-pol fusion protein. *Proc Natl Acad Sci U S A*  
572 88:174-8.

573 12. Van Alfen NK, Jaynes RA, Anagnostakis SL, Day PR. 1975. Chestnut Blight:  
574 Biological Control by Transmissible Hypovirulence in *Endothia parasitica*. *Science* 189:890-  
575 1.

576 13. Choi GH, Nuss DL. 1992. Hypovirulence of chestnut blight fungus conferred by an  
577 infectious viral cDNA. *Science* 257:800-3.

578 14. Ghabrial SA, Suzuki N. 2009. Viruses of plant pathogenic fungi. *Annu Rev*  
579 *Phytopathol* 47:353-84.

580 15. Segers GC, Zhang X, Deng F, Sun Q, Nuss DL. 2007. Evidence that RNA silencing  
581 functions as an antiviral defense mechanism in fungi. *Proc Natl Acad Sci U S A* 104:12902-6.

582 16. Zhang X, Segers GC, Sun Q, Deng F, Nuss DL. 2008. Characterization of hypovirus-  
583 derived small RNAs generated in the chestnut blight fungus by an inducible DCL-2-  
584 dependent pathway. *J Virol* 82:2613-9.

- 585 17. Hammond TM, Andrews MD, Roossinck MJ, Keller NP. 2008. Aspergillus  
586 mycoviruses are targets and suppressors of RNA silencing. *Eukaryot Cell* 7:350-7.
- 587 18. Yaegashi H, Shimizu T, Ito T, Kanematsu S. 2016. Differential Inductions of RNA  
588 Silencing among Encapsidated Double-Stranded RNA Mycoviruses in the White Root Rot  
589 Fungus *Rosellinia necatrix*. *J Virol* 90:5677-92.
- 590 19. Yu J, Lee KM, Cho WK, Park JY, Kim KH. 2018. Differential Contribution of RNA  
591 Interference Components in Response to Distinct *Fusarium graminearum* Virus Infections. *J*  
592 *Virol* 92.
- 593 20. Findley K, Oh J, Yang J, Conlan S, Deming C, Meyer JA, Schoenfeld D, Nomicos E,  
594 Park M, Program NIHISCCS, Kong HH, Segre JA. 2013. Topographic diversity of fungal  
595 and bacterial communities in human skin. *Nature* 498:367-70.
- 596 21. Clavaud C, Jourdain R, Bar-Hen A, Tichit M, Bouchier C, Pouradier F, El Rawadi C,  
597 Guillot J, Ménard-Szczebara F, Breton L. 2013. Dandruff is associated with disequilibrium in  
598 the proportion of the major bacterial and fungal populations colonizing the scalp. *PloS one*  
599 8:e58203.
- 600 22. Patino-Uzategui A, Amado Y, Cepero de Garcia M, Chaves D, Tabima J, Motta A,  
601 Cardenas M, Bernal A, Restrepo S, Celis A. 2011. Virulence gene expression in *Malassezia*  
602 spp from individuals with seborrheic dermatitis. *J Invest Dermatol* 131:2134-6.
- 603 23. Zhang E, Tanaka T, Tajima M, Tsuboi R, Nishikawa A, Sugita T. 2011.  
604 Characterization of the skin fungal microbiota in patients with atopic dermatitis and in  
605 healthy subjects. *Microbiol Immunol* 55:625-32.
- 606 24. Park T, Kim HJ, Myeong NR, Lee HG, Kwack I, Lee J, Kim BJ, Sul WJ, An S. 2017.

- 607 Collapse of human scalp microbiome network in dandruff and seborrhoeic dermatitis.  
608 *Experimental dermatology* 26:835-838.
- 609 25. Wang L, Clavaud C, Bar-Hen A, Cui M, Gao J, Liu Y, Liu C, Shibagaki N, Guéniche  
610 A, Jourdain R. 2015. Characterization of the major bacterial–fungal populations colonizing  
611 dandruff scalps in Shanghai, China, shows microbial disequilibrium. *Experimental*  
612 *dermatology* 24:398-400.
- 613 26. Xu Z, Wang Z, Yuan C, Liu X, Yang F, Wang T, Wang J, Manabe K, Qin O, Wang X.  
614 2016. Dandruff is associated with the conjoined interactions between host and  
615 microorganisms. *Scientific reports* 6:srep24877.
- 616 27. Grice EA, Dawson TL, Jr. 2017. Host-microbe interactions: *Malassezia* and human  
617 skin. *Curr Opin Microbiol* 40:81-87.
- 618 28. Sharma S, Gupta S, Shrivastava JN. 2011. Presence of Virus like Particles in Human  
619 Pathogenic Fungi: *Chrysosporium* sps and *Candida albicans*. *Indian J Virol* 22:104-10.
- 620 29. Park M, Cho YJ, Lee YW, Jung WH. 2017. Whole genome sequencing analysis of  
621 the cutaneous pathogenic yeast *Malassezia restricta* and identification of the major lipase  
622 expressed on the scalp of patients with dandruff. *Mycoses* 60:188-197.
- 623 30. EDY VG, SZEKELY M, LOVINY T, DREYER C. 1976. Action of Nucleases on  
624 Double-Stranded RNA. *European journal of biochemistry* 61:563-572.
- 625 31. Sommer SS, Wickner RB. 1982. Yeast L dsRNA consists of at least three distinct  
626 RNAs; evidence that the non-Mendelian genes [HOK],[NEX] and [EXL] are on one of these  
627 dsRNAs. *Cell* 31:429-441.

- 628 32. Park CM, Lopinski JD, Masuda J, Tzeng TH, Bruenn JA. 1996. A second double-  
629 stranded RNA virus from yeast. *Virology* 216:451-4.
- 630 33. Taylor DJ, Ballinger MJ, Bowman SM, Bruenn JA. 2013. Virus-host co-evolution  
631 under a modified nuclear genetic code. *PeerJ* 1:e50.
- 632 34. Bruenn JA. 1993. A closely related group of RNA-dependent RNA polymerases from  
633 double-stranded RNA viruses. *Nucleic Acids Res* 21:5667-9.
- 634 35. Schmitt MJ, Breinig F. 2002. The viral killer system in yeast: from molecular biology  
635 to application. *FEMS microbiology reviews* 26:257-276.
- 636 36. Wickner RB, Leibowitz MJ. 1979. Mak mutants of yeast: mapping and  
637 characterization. *J Bacteriol* 140:154-60.
- 638 37. Tercero J, Dinman J, Wickner R. 1993. Yeast MAK3 N-acetyltransferase recognizes  
639 the N-terminal four amino acids of the major coat protein (gag) of the LA double-stranded  
640 RNA virus. *Journal of bacteriology* 175:3192-3194.
- 641 38. Tercero J, Wickner RB. 1992. MAK3 encodes an N-acetyltransferase whose  
642 modification of the LA gag NH2 terminus is necessary for virus particle assembly. *Journal of*  
643 *Biological Chemistry* 267:20277-20281.
- 644 39. Fujimura T, Wickner RB. 1987. LA double-stranded RNA viruslike particle  
645 replication cycle in *Saccharomyces cerevisiae*: particle maturation in vitro and effects of  
646 mak10 and pet18 mutations. *Molecular and cellular biology* 7:420-426.
- 647 40. Lee Y-J, Wickner R. 1992. MAK10, a glucose-repressible gene necessary for  
648 replication of a dsRNA virus of *Saccharomyces cerevisiae*, has T cell receptor alpha-subunit

649 motifs. *Genetics* 132:87-96.

650 41. Wickner RB, Ridley SP, Fried HM, Ball SG. 1982. Ribosomal protein L3 is involved  
651 in replication or maintenance of the killer double-stranded RNA genome of *Saccharomyces*  
652 *cerevisiae*. *Proceedings of the National Academy of Sciences* 79:4706-4708.

653 42. Ohtake Y, Wickner RB. 1995. Yeast virus propagation depends critically on free 60S  
654 ribosomal subunit concentration. *Molecular and Cellular Biology* 15:2772-2781.

655 43. Ryu S-W, Lee S-J, Park M-Y, Jun J-i, Jung Y-K, Kim E. 2003. Fas-associated factor 1,  
656 FAF1, is a member of Fas death-inducing signaling complex. *Journal of Biological Chemistry*  
657 278:24003-24010.

658 44. Fujikura D, Miyazaki T. 2018. Programmed Cell Death in the Pathogenesis of  
659 Influenza. *Int J Mol Sci* 19.

660 45. Jorgensen I, Rayamajhi M, Miao EA. 2017. Programmed cell death as a defence  
661 against infection. *Nat Rev Immunol* 17:151-164.

662 46. Banks GT, Buck KW, Chain EB, Himmelweit F, Marks JE, Tyler JM, Hollings M,  
663 Last FT, Stone OM. 1968. Viruses in fungi and interferon stimulation. *Nature* 218:542-5.

664 47. Kleinschmidt WJ, Cline JC, Murphy EB. 1964. Interferon Production Induced by  
665 Statolon. *Proc Natl Acad Sci U S A* 52:741-4.

666 48. Lampson GP, Tytell AA, Field AK, Nemes MM, Hilleman MR. 1967. Inducers of  
667 interferon and host resistance. I. Double-stranded RNA from extracts of *Penicillium*  
668 *funiculosum*. *Proc Natl Acad Sci U S A* 58:782-9.

669 49. Perales-Linares R, Navas-Martin S. 2013. Toll-like receptor 3 in viral pathogenesis:

670 friend or foe? *Immunology* 140:153-67.

671 50. Thompson MR, Kaminski JJ, Kurt-Jones EA, Fitzgerald KA. 2011. Pattern  
672 recognition receptors and the innate immune response to viral infection. *Viruses* 3:920-40.

673 51. Claudepierre MC, Hortelano J, Schaedler E, Kleinpeter P, Geist M, Remy-Ziller C,  
674 Brandely R, Tosch C, Laruelle L, Jawhari A, Menguy T, Marchand JB, Romby P, Schultz P,  
675 Hartmann G, Rooke R, Bonnefoy JY, Preville X, Rittner K. 2014. Yeast virus-derived  
676 stimulator of the innate immune system augments the efficacy of virus vector-based  
677 immunotherapy. *J Virol* 88:5242-55.

678 52. Ishikawa T, Itoh F, Yoshida S, Saijo S, Matsuzawa T, Gono T, Saito T, Okawa Y,  
679 Shibata N, Miyamoto T, Yamasaki S. 2013. Identification of distinct ligands for the C-type  
680 lectin receptors Mincle and Dectin-2 in the pathogenic fungus *Malassezia*. *Cell Host Microbe*  
681 13:477-88.

682 53. Vargas G, Rocha JD, Oliveira DL, Albuquerque PC, Frases S, Santos SS, Nosanchuk  
683 JD, Gomes AM, Medeiros LC, Miranda K, Sobreira TJ, Nakayasu ES, Arigi EA, Casadevall  
684 A, Guimaraes AJ, Rodrigues ML, Freire-de-Lima CG, Almeida IC, Nimrichter L. 2015.  
685 Compositional and immunobiological analyses of extracellular vesicles released by *Candida*  
686 *albicans*. *Cell Microbiol* 17:389-407.

687 54. Samuel CE. 2001. Antiviral actions of interferons. *Clinical microbiology reviews*  
688 14:778-809.

689 55. Brierley I, Bournnell ME, Binns MM, Bilimoria B, Blok VC, Brown TD, Inglis SC.  
690 1987. An efficient ribosomal frame-shifting signal in the polymerase-encoding region of the  
691 coronavirus IBV. *EMBO J* 6:3779-85.



- 692 56. Jacks T, Varmus HE. 1985. Expression of the Rous sarcoma virus pol gene by  
693 ribosomal frameshifting. *Science* 230:1237-42.
- 694 57. Jacks T, Madhani HD, Masiarz FR, Varmus HE. 1988. Signals for ribosomal  
695 frameshifting in the Rous sarcoma virus gag-pol region. *Cell* 55:447-58.
- 696 58. Magliani W, Conti S, Gerloni M, Bertolotti D, Polonelli L. 1997. Yeast killer systems.  
697 *Clinical microbiology reviews* 10:369-400.
- 698 59. Tercero JC, Riles LE, Wickner RB. 1992. Localized mutagenesis and evidence for  
699 post-transcriptional regulation of MAK3. A putative N-acetyltransferase required for double-  
700 stranded RNA virus propagation in *Saccharomyces cerevisiae*. *J Biol Chem* 267:20270-6.
- 701 60. Wickner RB. 1996. Double-stranded RNA viruses of *Saccharomyces cerevisiae*.  
702 *Microbiological reviews* 60:250.
- 703 61. Thrash C, Bankier AT, Barrell BG, Sternglanz R. 1985. Cloning, characterization,  
704 and sequence of the yeast DNA topoisomerase I gene. *Proceedings of the National Academy*  
705 *of Sciences* 82:4374-4378.
- 706 62. Widner WR, Wickner RB. 1993. Evidence that the SKI antiviral system of  
707 *Saccharomyces cerevisiae* acts by blocking expression of viral mRNA. *Molecular and*  
708 *cellular biology* 13:4331-4341.
- 709 63. Masison DC, Blanc A, Ribas JC, Carroll K, Sonenberg N, Wickner RB. 1995.  
710 Decoying the cap-mRNA degradation system by a double-stranded RNA virus and poly (A)-  
711 mRNA surveillance by a yeast antiviral system. *Molecular and Cellular Biology* 15:2763-  
712 2771.

- 713 64. Benard L, Carroll K, Valle RC, Masison DC, Wickner RB. 1999. The ski7 antiviral  
714 protein is an EF1- $\alpha$  homolog that blocks expression of non-Poly (A) mRNA in  
715 *Saccharomyces cerevisiae*. *Journal of virology* 73:2893-2900.
- 716 65. McBride RC, Boucher N, Park DS, Turner PE, Townsend JP. 2013. Yeast response to  
717 LA virus indicates coadapted global gene expression during mycoviral infection. *FEMS yeast*  
718 *research* 13:162-179.
- 719 66. Wu M, Jin F, Zhang J, Yang L, Jiang D, Li G. 2012. Characterization of a novel  
720 bipartite double-stranded RNA mycovirus conferring hypovirulence in the phytopathogenic  
721 fungus *Botrytis porri*. *J Virol* 86:6605-19.
- 722 67. Wan J, Basu K, Mui J, Vali H, Zheng H, Laliberte JF. 2015. Ultrastructural  
723 Characterization of Turnip Mosaic Virus-Induced Cellular Rearrangements Reveals  
724 Membrane-Bound Viral Particles Accumulating in Vacuoles. *J Virol* 89:12441-56.
- 725 68. Matsumoto M, Oshiumi H, Seya T. 2011. Antiviral responses induced by the TLR3  
726 pathway. *Reviews in Medical Virology* 21:67-77.
- 727 69. Tabeta K, Georgel P, Janssen E, Du X, Hoebe K, Crozat K, Mudd S, Shamel L,  
728 Sovath S, Goode J. 2004. Toll-like receptors 9 and 3 as essential components of innate  
729 immune defense against mouse cytomegalovirus infection. *Proceedings of the National*  
730 *Academy of Sciences* 101:3516-3521.
- 731 70. Hartley MA, Ronet C, Zangger H, Beverley SM, Fasel N. 2012. *Leishmania* RNA  
732 virus: when the host pays the toll. *Frontiers in Cellular and Infection Microbiology* 2.
- 733 71. Kim M, Cho Y-J, Park M, Choi Y, Hwang SY, Jung WH. 2018. Genomic tandem  
734 quadruplication is associated with ketoconazole resistance in *Malassezia pachydermatis*. *J*

735 Microbiol Biotechnol 28:1937-1945.

736 72. Park M, Jung WH, Han SH, Lee YH, Lee YW. 2015. Characterisation and  
737 Expression Analysis of MrLip1, a Class 3 Family Lipase of *Malassezia restricta*. *Mycoses*  
738 58:671-8.

739 73. Leeming JP, Notman FH. 1987. Improved methods for isolation and enumeration of  
740 *Malassezia furfur* from human skin. *J Clin Microbiol* 25:2017-9.

741 74. Okada R, Kiyota E, Moriyama H, Fukuhara T, Natsuaki T. 2015. A simple and rapid  
742 method to purify viral dsRNA from plant and fungal tissue. *Journal of General Plant*  
743 *Pathology* 81:103-107.

744 75. Moon S, Byun Y, Kim HJ, Jeong S, Han K. 2004. Predicting genes expressed via -1  
745 and +1 frameshifts. *Nucleic Acids Res* 32:4884-92.

746 76. Waterhouse AM, Procter JB, Martin DM, Clamp M, Barton GJ. 2009. Jalview  
747 Version 2--a multiple sequence alignment editor and analysis workbench. *Bioinformatics*  
748 25:1189-91.

749 77. Kumar S, Nei M, Dudley J, Tamura K. 2008. MEGA: a biologist-centric software for  
750 evolutionary analysis of DNA and protein sequences. *Brief Bioinform* 9:299-306.

751 78. Kumar S, Stecher G, Li M, Knyaz C, Tamura K. 2018. MEGA X: Molecular  
752 Evolutionary Genetics Analysis across Computing Platforms. *Mol Biol Evol* 35:1547-1549.

753 79. Vargas G, Rocha JD, Oliveira DL, Albuquerque PC, Frases S, Santos SS, Nosanchuk  
754 JD, Gomes AMO, Medeiros LC, Miranda K. 2015. Compositional and immunobiological  
755 analyses of extracellular vesicles released by *Candida albicans*. *Cellular microbiology*

756 17:389-407.

757 80. Koh H-J, Kim Y-R, Kim J-S, Yun J-S, Kim S, Kim SY, Jang K, Yang C-S. 2018.  
758 CD82 hypomethylation is essential for tuberculosis pathogenesis via regulation of RUNX1-  
759 Rab5/22. *Experimental & molecular medicine* 50:62.

760 81. Saitou N, Nei M. 1987. The neighbor-joining method: a new method for  
761 reconstructing phylogenetic trees. *Mol Biol Evol* 4:406-25.

762 82. Felsenstein J. 1985. Confidence Limits on Phylogenies: An Approach Using the  
763 Bootstrap. *Evolution* 39:783-791.

764 83. Sanderlin RS, Ghabrial SA. 1978. Physicochemical properties of two distinct types  
765 of virus-like particles from *Helminthosporium victoriae*. *Virology* 87:142-51.

766 84. Shapira R, Choi GH, Nuss DL. 1991. Virus-like genetic organization and expression  
767 strategy for a double-stranded RNA genetic element associated with biological control of  
768 chestnut blight. *EMBO J* 10:731-9.

769 85. Hillman BI, Halpern BT, Brown MP. 1994. A viral dsRNA element of the chestnut  
770 blight fungus with a distinct genetic organization. *Virology* 201:241-50.

771 86. Van der Lende TR, Duitman EH, Gunnewijk MG, Yu L, Wessels JG. 1996.  
772 Functional analysis of dsRNAs (L1, L3, L5, and M2) associated with isometric 34-nm virions  
773 of *Agaricus bisporus* (white button mushroom). *Virology* 217:88-96.

774 87. Nomura K, Osaki H, Iwanami T, Matsumoto N, Ohtsu Y. 2003. Cloning and  
775 characterization of a totivirus double-stranded RNA from the plant pathogenic fungus,  
776 *Helicobasidium mompa* Tanaka. *Virus Genes* 26:219-26.

- 777 88. Tuomivirta TT, Hantula J. 2003. Two unrelated double-stranded RNA molecule  
778 patterns in *Gremmeniella abietina* type A code for putative viruses of the families Totiviridae  
779 and Partitiviridae. *Arch Virol* 148:2293-305.
- 780 89. Jiang D, Ghabrial SA. 2004. Molecular characterization of *Penicillium chrysogenum*  
781 virus: reconsideration of the taxonomy of the genus Chrysovirus. *J Gen Virol* 85:2111-21.
- 782 90. Urayama S, Ohta T, Onozuka N, Sakoda H, Fukuhara T, Arie T, Teraoka T,  
783 Moriyama H. 2012. Characterization of *Magnaporthe oryzae* chrysovirus 1 structural proteins  
784 and their expression in *Saccharomyces cerevisiae*. *J Virol* 86:8287-95.
- 785 91. Wu Q, Luo Y, Lu R, Lau N, Lai EC, Li WX, Ding SW. 2010. Virus discovery by  
786 deep sequencing and assembly of virus-derived small silencing RNAs. *Proc Natl Acad Sci U*  
787 *S A* 107:1606-11.
- 788 92. Isawa H, Kuwata R, Hoshino K, Tsuda Y, Sakai K, Watanabe S, Nishimura M, Satho  
789 T, Kataoka M, Nagata N, Hasegawa H, Bando H, Yano K, Sasaki T, Kobayashi M, Mizutani  
790 T, Sawabe K. 2011. Identification and molecular characterization of a new nonsegmented  
791 double-stranded RNA virus isolated from *Culex* mosquitoes in Japan. *Virus Res* 155:147-55.
- 792 93. Mor SK, Phelps NB. 2016. Molecular detection of a novel totivirus from golden  
793 shiner (*Notemigonus crysoleucas*) baitfish in the USA. *Arch Virol* 161:2227-34.
- 794 94. Yang X, Zhang Y, Ge X, Yuan J, Shi Z. 2012. A novel totivirus-like virus isolated  
795 from bat guano. *Arch Virol* 157:1093-9.
- 796 95. Zhai Y, Attoui H, Mohd Jaafar F, Wang HQ, Cao YX, Fan SP, Sun YX, Liu LD,  
797 Mertens PP, Meng WS, Wang D, Liang G. 2010. Isolation and full-length sequence analysis  
798 of *Armigeres subalbatus* totivirus, the first totivirus isolate from mosquitoes representing a

- 799 proposed novel genus (Artivirus) of the family Totiviridae. *J Gen Virol* 91:2836-45.
- 800 96. Dihanich M, Van Tuinen E, Lambris J, Marshallsay B. 1989. Accumulation of  
801 viruslike particles in a yeast mutant lacking a mitochondrial pore protein. *Molecular and*  
802 *cellular biology* 9:1100-1108.
- 803 97. Leibowitz MJ, Wickner RB. 1978. pet 18: A chromosomal gene required for cell  
804 growth and for the maintenance of mitochondrial DNA and the killer plasmid of yeast.  
805 *Molecular and General Genetics MGG* 165:115-121.
- 806 98. Toh-e A, Sahashi Y. 1985. The PET18 locus of *Saccharomyces cerevisiae*: a complex  
807 locus containing multiple genes. *Yeast* 1:159-171.
- 808 99. Thrash C, Voelkel K, DiNardo S, Sternglanz R. 1984. Identification of  
809 *Saccharomyces cerevisiae* mutants deficient in DNA topoisomerase I activity. *Journal of*  
810 *Biological Chemistry* 259:1375-1377.
- 811 100. Icho T, Wickner RB. 1988. The MAK11 protein is essential for cell growth and  
812 replication of M double-stranded RNA and is apparently a membrane-associated protein.  
813 *Journal of Biological Chemistry* 263:1467-1475.
- 814 101. Wickner RB. 1988. Host function of MAK16: G1 arrest by a mak16 mutant of  
815 *Saccharomyces cerevisiae*. *Proceedings of the National Academy of Sciences* 85:6007-6011.
- 816 102. Carroll K, Wickner RB. 1995. Translation and M1 double-stranded RNA propagation:  
817 MAK18= RPL41B and cycloheximide curing. *Journal of bacteriology* 177:2887-2891.
- 818 103. Toh-E A, Guerry P, Wickner RB. 1978. Chromosomal superkiller mutants of  
819 *Saccharomyces cerevisiae*. *Journal of bacteriology* 136:1002-1007.

- 820 104. Ball SG, Tirtiaux C, Wickner RB. 1984. Genetic control of LA and L-(BC) dsRNA  
821 copy number in killer systems of *Saccharomyces cerevisiae*. *Genetics* 107:199-217.
- 822 105. Ridley SP, Sommer SS, Wickner RB. 1984. Superkiller mutations in *Saccharomyces*  
823 *cerevisiae* suppress exclusion of M2 double-stranded RNA by LA-HN and confer cold  
824 sensitivity in the presence of M and LA-HN. *Molecular and Cellular Biology* 4:761-770.
- 825 106. Dmochowska A, Dignard D, Henning D, Thomas DY, Bussey H. 1987. Yeast KEX1  
826 gene encodes a putative protease with a carboxypeptidase B-like function involved in killer  
827 toxin and  $\alpha$ -factor precursor processing. *Cell* 50:573-584.
- 828 107. Wickner RB. 1974. Chromosomal and nonchromosomal mutations affecting the"  
829 killer character" of *Saccharomyces cerevisiae*. *Genetics* 76:423-432.
- 830 108. Wickner RB, Leibowitz MJ. 1976. Two chromosomal genes required for killing  
831 expression in killer strains of *Saccharomyces cerevisiae*. *Genetics* 82:429-442.

832

833

834 **Table 1. The number of differentially expressed genes regulated by virus**

|               | The number of differential expressed genes (+virus/-virus) |        |        |         | Total |
|---------------|------------------------------------------------------------|--------|--------|---------|-------|
|               | 2-fold                                                     | 3-fold | 4-fold | >5-fold |       |
| Upregulated   | 204                                                        | 32     | 12     | 10      | 258   |
| Downregulated | 597                                                        | 152    | 70     | 60      | 809   |

835

836

837

838



839 **Table 2. Differential expression of genes involved in maintaining dsRNA virus**

| <i>S. cerevisiae</i><br>gene           | An encoded protein and/or function                    | Needed by<br><i>S. cerevisiae</i> virus | <i>M. restricta</i><br>gene ID | Fold change<br>(+virus/-virus) | Reference(s) |
|----------------------------------------|-------------------------------------------------------|-----------------------------------------|--------------------------------|--------------------------------|--------------|
| <i>MAK3</i>                            | N-acetyltransferase modifying Gag                     |                                         | MRET_0174                      | 0.62                           | (38, 59)     |
| <i>MAK10</i>                           | Non-catalytic subunit of N-terminal acetyltransferase | L-A, M                                  | No hits                        |                                | (40, 96)     |
| <i>PET18</i><br>( <i>MAK30+MAK31</i> ) | Unknown                                               |                                         | No hits                        |                                | (97, 98)     |
| <i>MAK1 (TOP1)</i>                     | DNA topoisomerase I                                   |                                         | MRET_0706                      | 0.41                           | (99)         |
| <i>MAK2</i>                            |                                                       |                                         | MRET_4192                      | 0.88                           |              |
| <i>MAK5</i>                            |                                                       |                                         | MRET_0265                      | 0.44                           | (42)         |
| <i>MAK21</i>                           | 60S subunit biosynthesis                              |                                         | MRET_2922                      | 0.24                           |              |
| <i>MAK11</i>                           |                                                       | M                                       | MRET_2252                      | 0.40                           | (42, 100)    |
| <i>MAK16</i>                           |                                                       |                                         | MRET_2745                      | 0.48                           | (42, 101)    |
| <i>MAK7 (RPL4A)</i>                    | 60S subunit protein L4                                |                                         | No hits                        |                                | (42)         |
| <i>MAK8 (TCM1)</i>                     | 60S subunit protein L3                                |                                         | MRET_1592                      | 0.24                           | (41)         |
| <i>MAK18 (RPL41B)</i>                  | 60S subunit protein L41                               |                                         | MRET_2856                      | 0.60                           | (102)        |

|                    |                                                                  |        |           |      |            |
|--------------------|------------------------------------------------------------------|--------|-----------|------|------------|
| <i>SKI1 (XRNI)</i> | 5'-3' exonuclease                                                |        | MRET_4129 | 0.73 | (103)      |
| <i>SKI2</i>        | RNA helicase                                                     |        | MRET_2647 | 0.91 |            |
| <i>SKI3</i>        | Tetratricopeptide repeat protein                                 |        | MRET_1481 | 0.78 |            |
| <i>SKI4 (CSLA)</i> | Exosome non-catalytic core component                             | L-A, M | MRET_2576 | 0.96 | (104, 105) |
| <i>SKI6</i>        | Exosome non-catalytic core component                             |        | MRET_3188 | 0.55 |            |
| <i>SKI7</i>        | GTP-binding protein                                              |        | No hits   |      |            |
| <i>SKI8</i>        | WD-repeat protein                                                |        | No hits   |      |            |
| <i>KEX1</i>        | Cell death protease essential for hypochlorite-induced apoptosis | M      | MRET_4176 | 0.93 | (106-108)  |
| <i>KEX2</i>        | Kexin, a subtilisin-like protease (proprotein convertase)        |        | MRET_0618 | 1.13 | (107, 108) |

840

841

842

843 **Table 3. Differential expression of genes involved in TCA cycle and electron transport chain**

| Gene      | Annotation                                                | Fold change<br>(+virus/-virus) |
|-----------|-----------------------------------------------------------|--------------------------------|
| MRET_1104 | NADH dehydrogenase (ubiquinone) Fe-S protein 7            | 2.85                           |
| MRET_1378 | succinate dehydrogenase (ubiquinone) iron-sulfur subunit  | 3.55                           |
| MRET_1709 | cytochrome c                                              | 2.56                           |
| MRET_1953 | NADH dehydrogenase (ubiquinone) Fe-S protein 1            | 2.44                           |
| MRET_2042 | fumarate hydratase, class II                              | 2.42                           |
| MRET_2097 | succinate dehydrogenase (ubiquinone) flavoprotein subunit | 2.19                           |
| MRET_2956 | 2-oxoglutarate dehydrogenase E1 component                 | 2.21                           |
| MRET_3173 | dihydrolipoamide dehydrogenase                            | 2.27                           |
| MRET_4117 | aconitate hydratase                                       | 3.55                           |

844

845

846

847 **Figures**

848

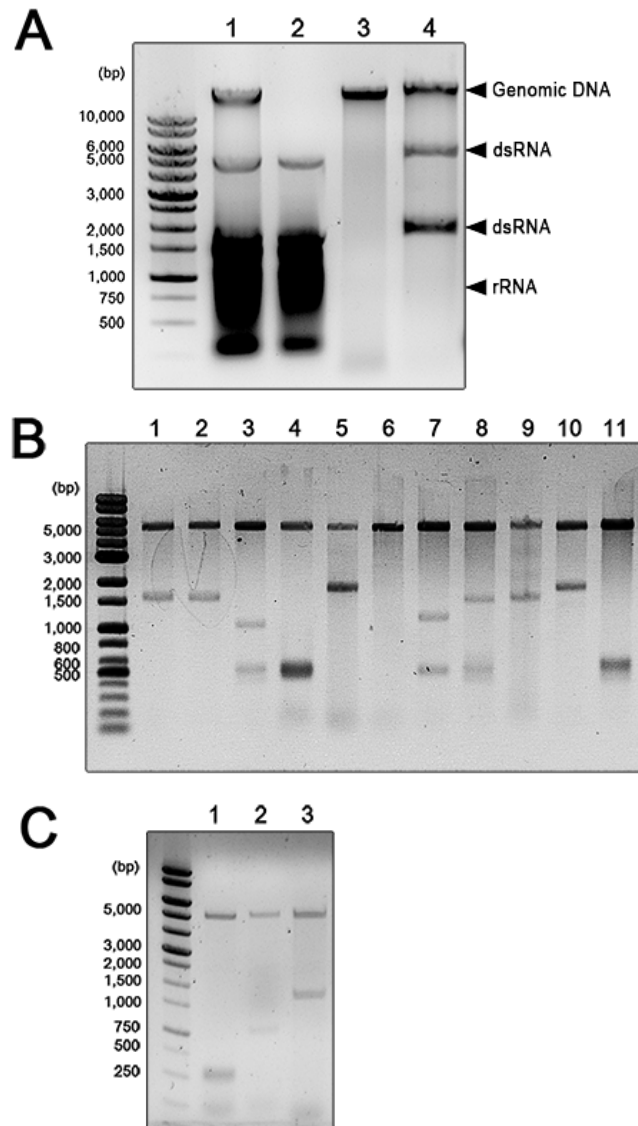

849

850 **Fig. 1. Extrachromosomal dsRNA segments in *Malassezia*.** (A) Nucleic acids from *M.*  
851 *restricta* KCTC 27540 were separated on a 0.7% agarose gel. Lane 1, total nucleic acids; lane  
852 2, total nucleic acids treated with DNase I; lane 3, total nucleic acids treated with RNase A;  
853 lane 4, total nucleic acids treated with RNase T1. (B) Presence of dsRNA in *M. restricta*

854 strains. The dsRNAs in *M. restricta* strains were separated on a 0.7% agarose gel. Each lane  
855 indicates *M. restricta* strains in which dsRNAs were found as follows: lane 1, *M. restricta*  
856 KCTC 27540; lane 2, *M. restricta* KCTC 27512; lane 3, *M. restricta* KCTC 27516; lane 4, *M.*  
857 *restricta* KCTC 27518; lane 5, *M. restricta* KCTC 27524; lane 6, *M. restricta* KCTC 27543;  
858 lane 7, *M. restricta* KCTC 27550; lane 8, *M. restricta* KCTC 27879; lane 9, *M. restricta*  
859 KCTC 27880; lane 10, *M. restricta* KCTC 27882; lane 11, *M. restricta* KCTC 27883. (C)  
860 dsRNAs were extracted from different *Malassezia* species and separated on a 0.7% agarose  
861 gel. Lane 1, *M. globosa* CBS 7966; lane 2, *M. pachydermatis* KCTC 27587; lane 3, *M.*  
862 *sympodialis* KCTC 27817.

863

864

865

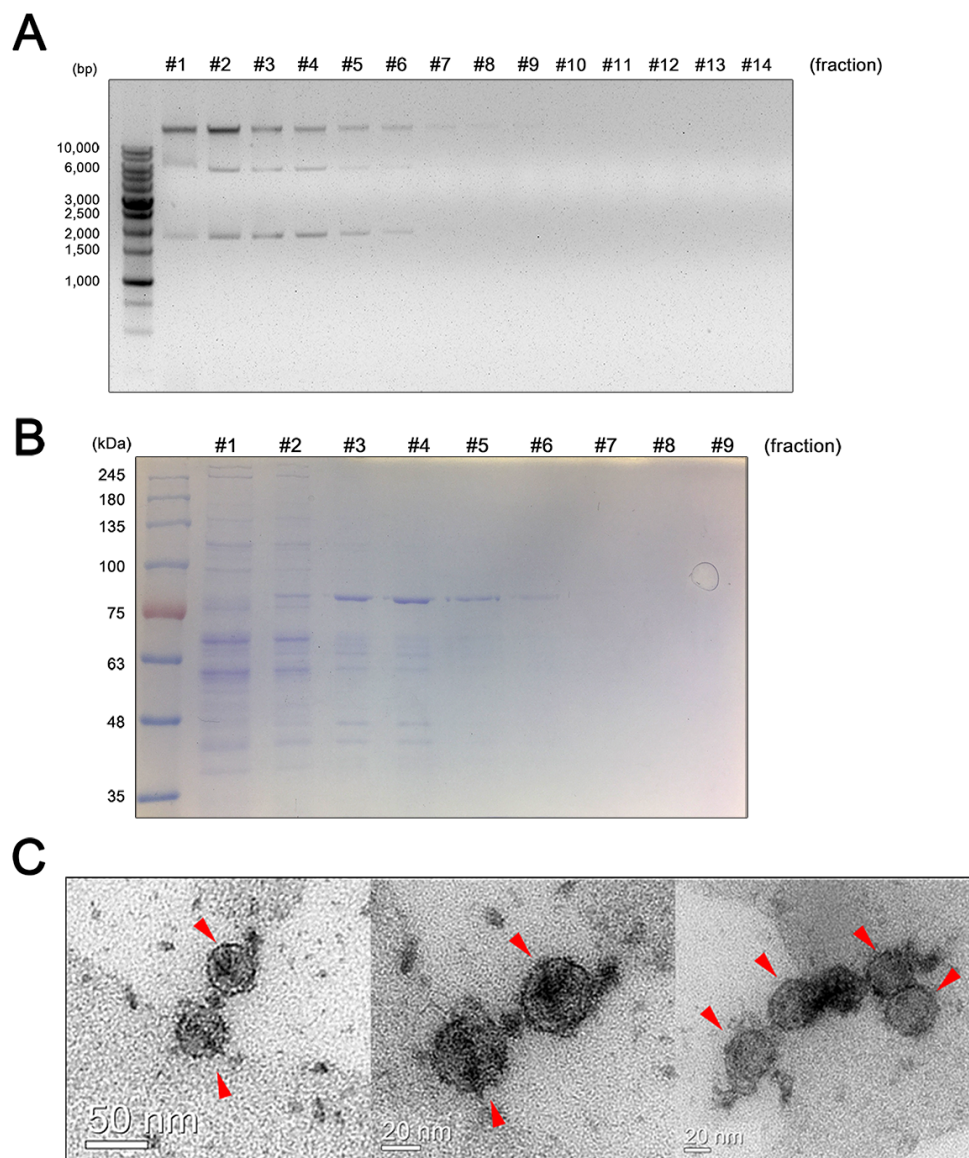

866

867 **Fig. 2. Isolation of virus particles from *M. restricta* KCTC 27540, and their TEM images.**

868 The collected fractions after sucrose gradient ultracentrifugation were analyzed for their

869 nucleic acids and proteins on an agarose gel (A) and SDS-PAGE gel (B), respectively. Images

870 of the viral particles (red arrows) were obtained using a transmission electron microscope (C).

871



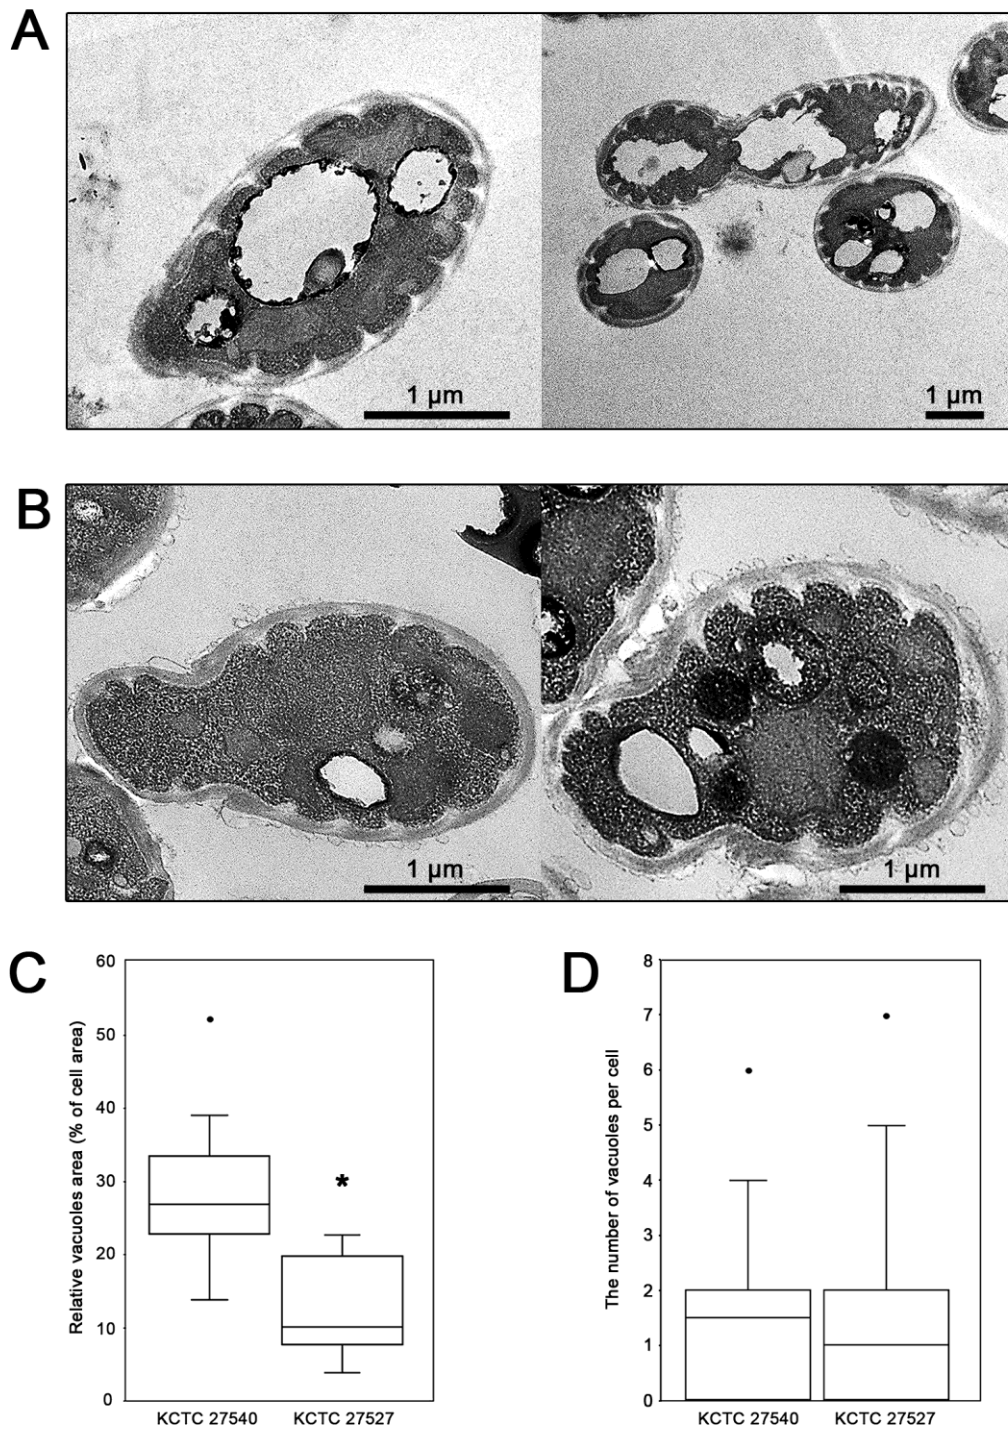

872

873 **Fig. 3. Morphology of vacuoles in *M. restricta* cells containing MrV40.** Ultrathin sections  
874 of strains KCTC 27540 (A) and KCTC 27527 (B) were observed by TEM. Cytoplasmic

875 vacuole formation in the strains, expressed as the percentage of cells occupied by vacuoles (n  
876 = 20 cells from each strain) (\*p < 0.001) (C) and number of vacuoles per cell (n = 30 cells  
877 from each strain) (D) were estimated. The measurements were displayed as a box plot  
878 including the median values with the upper and lower quartiles. The lines expanded from the  
879 boxes represent the minimum and maximum values, and outliers are displayed as dots.

880

881



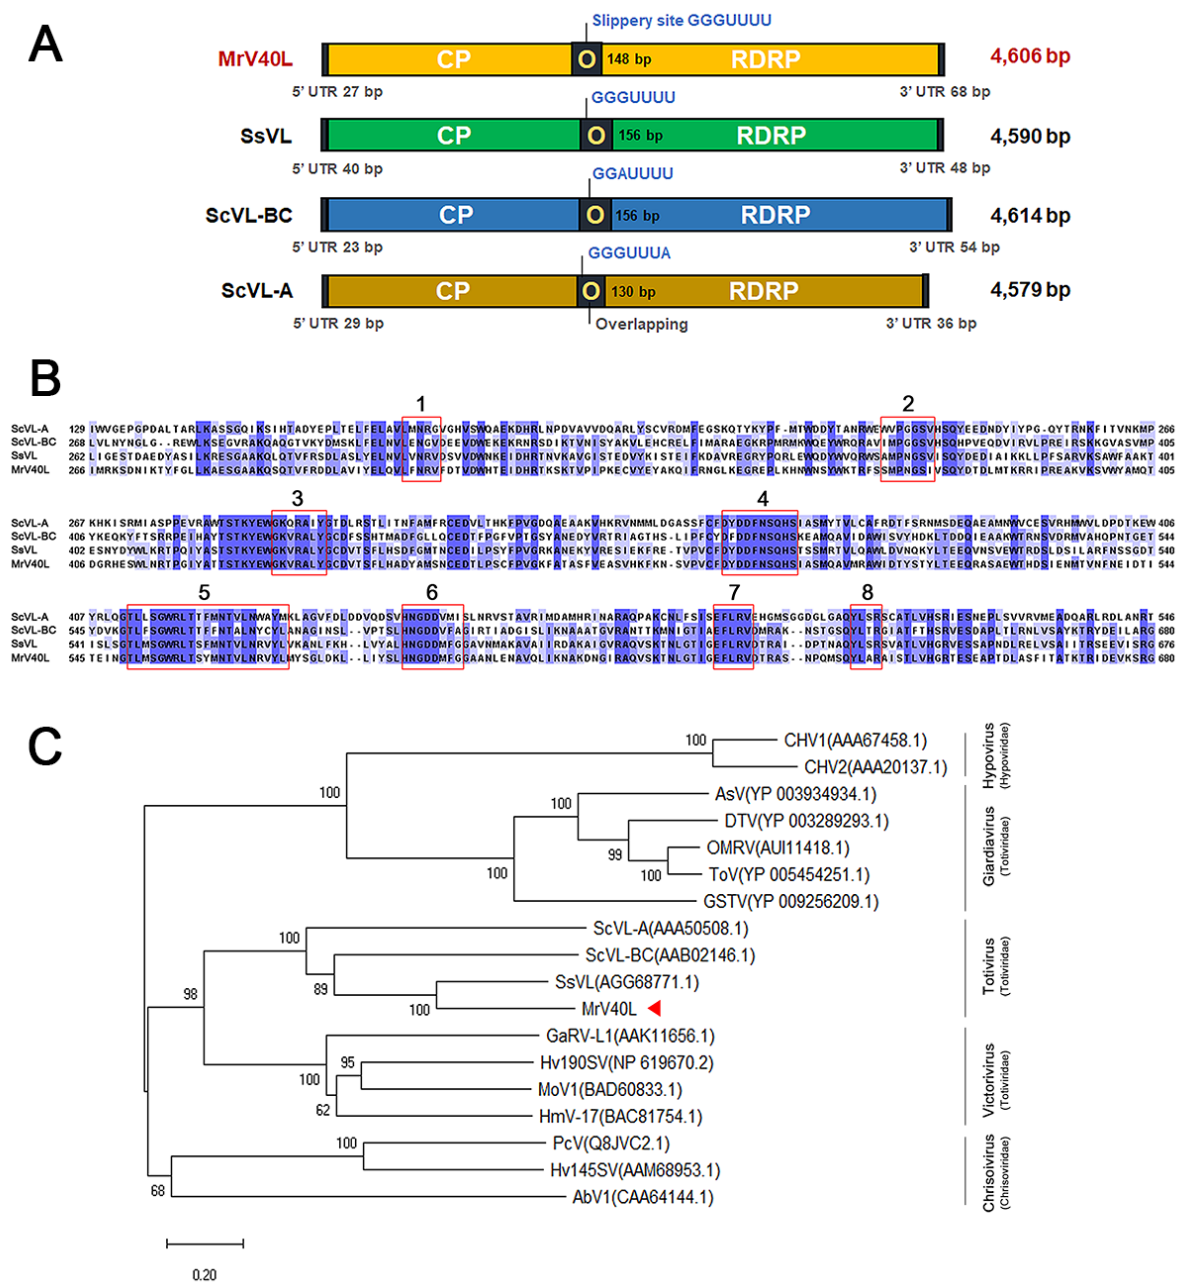

882

883

884 **Fig. 4. Genome and phylogenetic analysis of MrV40L.** (A) Comparison of the genomic

885 organization of MrV40L with that of other Totiviruses. (B) Eight conserved motifs within the

886 viral RDRP of MrV40L. The red boxes indicate conserved motifs. The amino acid sequences  
887 of ScVL-A, ScVL-BC, SsVL, and MrV40L were aligned using Jalview. (D) Multiple  
888 alignment of 18 amino acid sequences of RDRPs from dsRNA viruses was analyzed using the  
889 neighbor-joining method with bootstrap test (1,000 replicates) using MEGA X (78, 81, 82).  
890 The evolutionary distances are in units of the number of amino acid substitutions per site. All  
891 ambiguous positions were removed for each sequence pair. CHV1, *Cryphonectria* hypovirus  
892 1; CHV2, , *Cryphonectria* hypovirus 2; AsV, *Armigeres subalbatus* virus; DTV, *Drosophila*  
893 *melanogaster* totivirus; OMRV, *Omono river* virus; ToV, *Tianjin* totivirus; GSTV, *Golden*  
894 *shiner* totivirus; ScVL-A, *S. cerevisiae* virus L-A; ScVL-BC, *S. cerevisiae* virus L-BC; SsVL,  
895 *S. segobienesis* virus L; GaRV-L1, *Gremmeniella abietina* virus L1; Hv190SV,  
896 *Helminthosporium victoriae* virus-190S; MoV1, *Magnaporthe oryzae* virus 1; HmV-17,  
897 *Helicobasidium mompa* totivirus 1-17; PcV, *Penicillium chrysogenum* virus; Hv145SV,  
898 *Helminthosporium victoriae* 145S virus; AbV1, *Agaricus bisporus* virus 1 (8, 32, 33, 83-95).

899

900

901

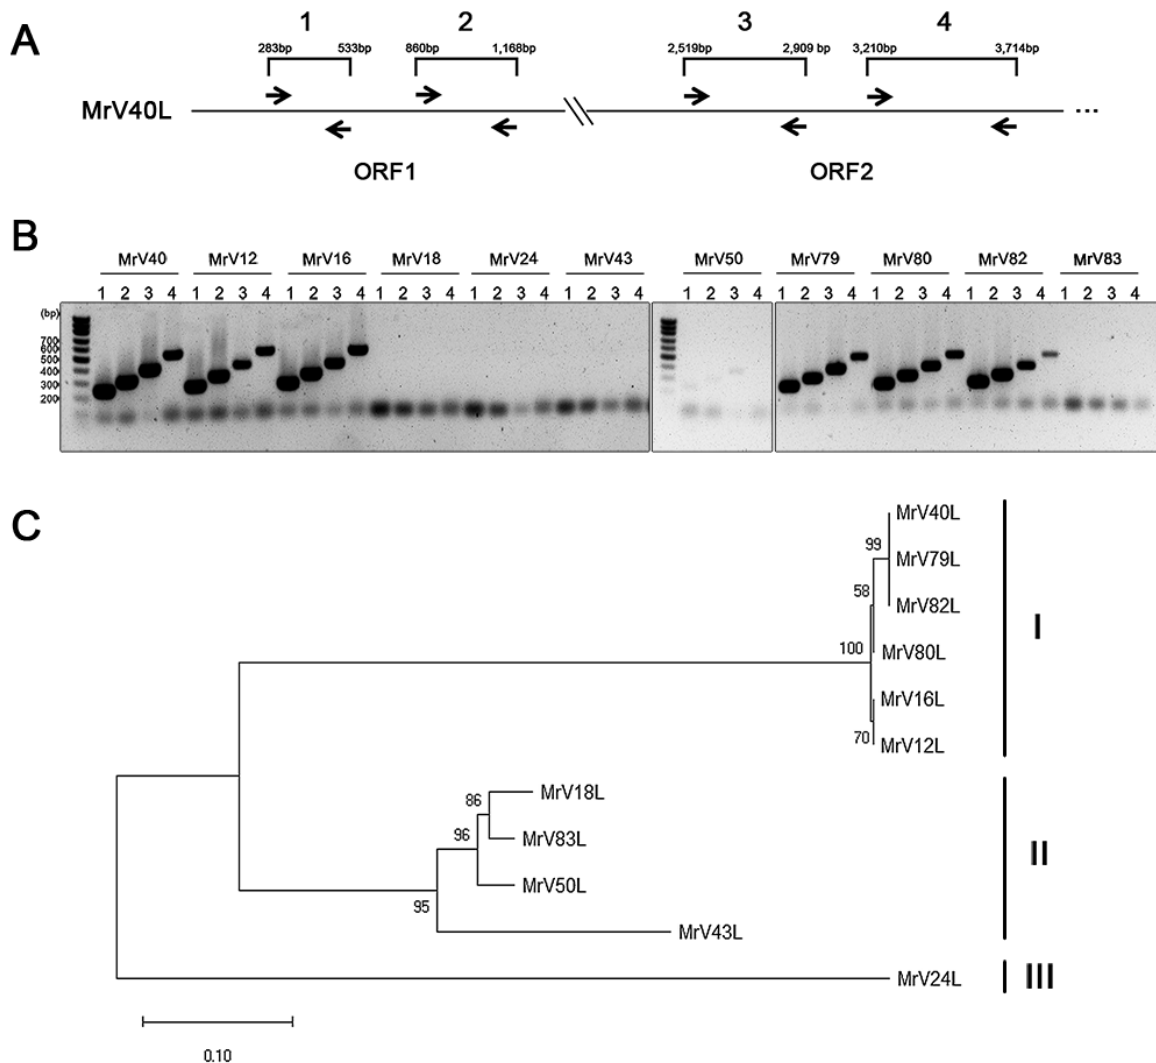

902

903

904 **Fig. 5. Phylogenetic classification of viruses found in *M. restricta*.** (A, B) The cDNAs of  
 905 dsRNAs from *M. restricta* strains were amplified using primers for genes encoding CP and  
 906 RDRP (ORF1 and ORF2, respectively) homologs in the viral genome. The following primers  
 907 were used: lane 1, MrV40L\_CP\_F1 and MrV40L\_CP\_R1; lane 2, MrV40L\_CP\_F2 and  
 908 MrV40L\_CP\_R2; lane 3, MrV40L\_RDRP\_F1 and MrV40L\_RDRP\_R1; lane 4,

909 MrV40L\_RDRP\_F2 and MrV40L\_RDRP\_R2 (see Table S2 in supplemental material). (C)  
910 MrV-Ls were clustered into three clades (clade I, II, and III). Multiple alignment of  
911 nucleotide sequences of combined parts of *gag* and *pol* from 11 MrV-Ls was analyzed by the  
912 neighbor-joining method with bootstrap test (1,000 replicates) in MEGA X (78, 81, 82). The  
913 evolutionary distances are in units of the number of base substitutions per site.

914

915

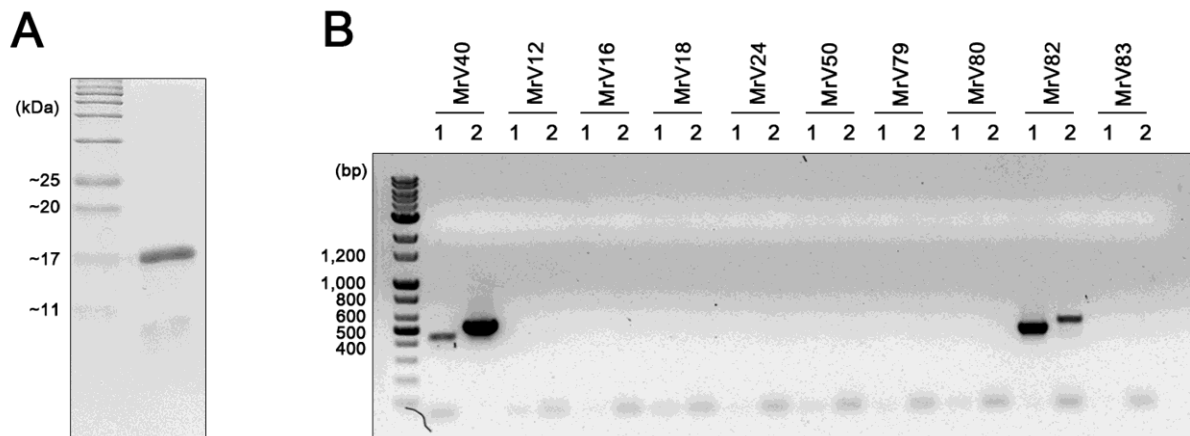

916

917

918

919 **Fig. 6. Characterization and similarity analysis of MrV40S.** (A) The protein encoded by  
920 ORF3 was heterologously expressed in *E. coli* and purified using a His-tag column. (B) RT-  
921 PCR results. The primers specific to MrV40S were used to amplify satellite dsRNA from  
922 other *M. restricta* strain containing small dsRNA segments. The following primers were used:  
923 lane 1, MrV40S\_F5 and V40S\_SP1; lane 2, MrV40S\_ORF\_F1 and MrV40S\_R1 (see Table  
924 S2 in supplemental material).

925

926

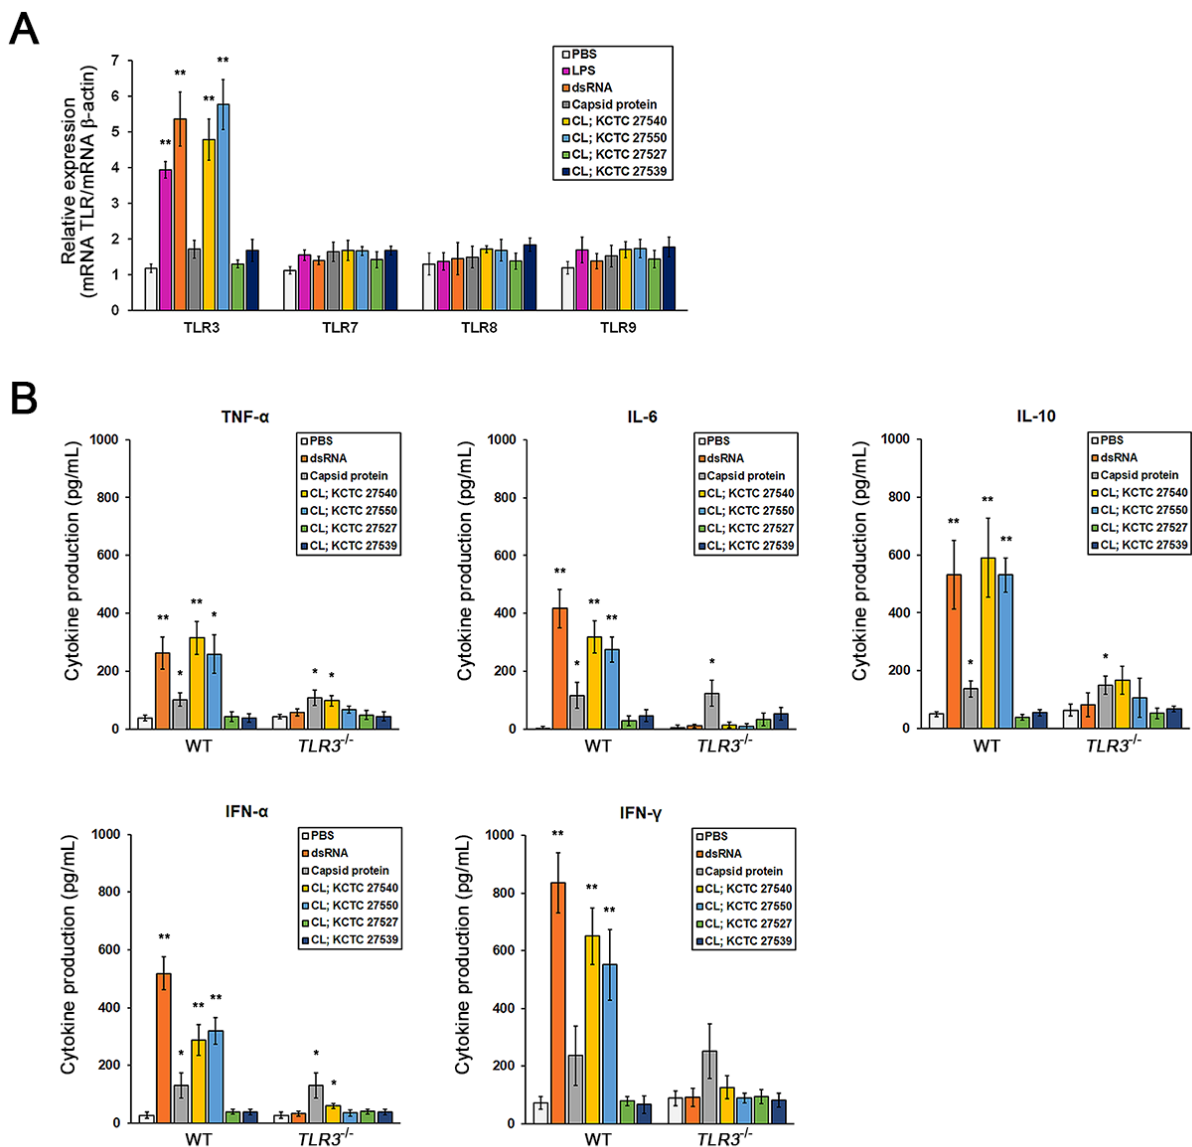

927

928 **Fig. 7. Evaluation of *TLR* and cytokine levels upon treatment with the viral elements.**

929 *TLR* expression (A) and cytokines production (B) in BMDCs co-incubated with purified

930 MrV40 dsRNA, purified capsid protein of MrV40, and total cell lysates of the *M. restricta*

931 strains containing the virus (KCTC 27540 and KCTC 27550) and virus-free *M. restricta*

932 strains (KCTC 27527 and KCTC 27539). PBS and lipopolysaccharide served as the negative

933 and positive controls, respectively. WT; wild- type mice (C57BL/6), *TLR3*<sup>-/-</sup>; *TLR3* knock out

934 mice (B6;129S1-Tlr3<sup>tm1Flv</sup>/J, 005217), CL; cell lysate. (\* $p < 0.01$  and \*\* $p < 0.001$ ).
